# Supplementary material for: How many bird and mammal extinctions has recent conservation action prevented?
Source: bioRxiv or medRxiv preprint supplement (doi:10.1101/2020.02.11.943902), 2020-02-12
Supplement: Supplementary file [file media-1.pdf]

# 1 Online supporting information

## 2 Extended methods

### 3 Initial screening process

4 We examined which bird and mammal species may have been prevented from going extinct during  
5 two time periods: 1993–2020, and 2010–2020. We chose these years as they correspond,  
6 respectively: to the period in which the Convention on Biological Diversity (CBD) has been in force;  
7 and the period for implementation of the CBD Strategic Plan for Biodiversity with its 20 Aichi targets  
8 (starting in 2011).

9 We downloaded the Red List assessment history of birds and mammals from the IUCN Red List on 24  
10 January 2019 (IUCN 2019). We considered species as potential candidates if they are currently  
11 extant or Extinct in the Wild and were, at any point since 1993:

- 12 - listed as Extinct in the Wild
- 13 - listed as Critically Endangered (any criterion)
- 14 - listed as Endangered under criterion D, i.e., with fewer than 250 mature individuals

15 In some cases, species' Red List assessments in any given year are subsequently found to have been  
16 erroneous, either because of new information (e.g., a larger or smaller population size than  
17 previously estimated) or because of taxonomic changes (e.g., a species split in two). In these cases,  
18 the categories used in the above-mentioned filtering process were the ones obtained after  
19 retrospective correction based on current knowledge rather than the initial Red List classification (as  
20 also applied in calculating the IUCN Red List Index; Butchart et al 2007, Hoffmann et al., 2011). This  
21 initial list included 368 bird and 263 mammal species. Of these, six bird and two mammal species  
22 were classified as Extinct in the Wild as of 2019 (IUCN 2019) and considered to have a 100%  
23 probability that they would have gone extinct without further conservation.

24 We then narrowed down the remaining list of species by examining the IUCN Red List accounts of  
25 these species. We retained species for which there was evidence that it could have gone extinct  
26 during the time periods under consideration: those with < 200 individuals or those with populations  
27 with very rapid declines, provided there was a significant threat or suite of threats that might have  
28 driven them extinct in the absence of actions, and for which actions were implemented that  
29 mitigated these threats (Butchart et al., 2006). Hence, we excluded species with no information on  
30 conservation actions, or for which actions appeared insufficient to address the main threats. Where  
31 the effectiveness of actions was unclear based on the information available, the species was  
32 retained.

33 To give some examples, Saola *Pseudoryx nghetinhensis* is severely threatened by poaching, but the  
34 Red List account details that protected areas and anti-poaching measures are largely ineffective  
35 (Timmins et al., 2016), hence it was excluded. This decision is supported by the conclusion of  
36 Hoffmann et al. (2015) who considered an Extinct listing for this species as a pessimistic scenario,  
37 noting that “while Saola has been found in several protected areas in both its range countries, much  
38 potential habitat is outside protected areas. Moreover the PAs are not sufficiently well managed to  
39 remove major hunting threats to this species or to have headed off major habitat conversion that  
40 would otherwise have occurred. Therefore, this species would, following cessation of conservation  
41 actions in 1996, have continued its decline towards extinction in a similar manner to that seen in the  
42 last 12 years”. Some notable conservation success stories such as Black Robin *Petroica traversi* or

43 Mauritius Kestrel *Falco punctatus* were also excluded, as actions took place for these species prior to  
44 1993 and they had recovered sufficiently by 1993 to not be considered by us.

45 This filtering process was undertaken separately by two groups of people: all species were screened  
46 by a team at Newcastle University (either by FB, LM or PJKM). Birds were additionally screened by  
47 CH, RM, and HW at BirdLife International, and mammals were additionally screened by MA at the  
48 Global Mammal Assessment. The lists were then compared. Initial agreement for categories was  
49 71% for birds and 80% for mammals. The Newcastle team then investigated the species with  
50 different assessments in more detail, and either confirmed the assessment by the other teams  
51 (based on the new information they provided) or added more information to support their  
52 assessment. This information then went back to the teams at BirdLife International or the Global  
53 Mammal Assessment, respectively, and any remaining differences were discussed. Species for which  
54 consensus could not be achieved were retained on the candidate list. The shortlist of species  
55 included 48 bird and 25 mammal species (in addition to the six Extinct in the Wild bird and two  
56 Extinct in the Wild mammal species).

### 57 [Compiling species information](#)

58 Data were extracted for all initial candidate species. The IUCN Red List species accounts were  
59 searched to extract population estimates and trends for 1993, 2010, and the latest assessment year,  
60 as well as threats and conservation actions. Information on threats and actions were extracted for  
61 the respective time periods. We also added information on generation lengths of birds based on  
62 BirdLife International (2020), and generation lengths and longevity for mammals, based on Pacifici et  
63 al. (2013). We added a summary of the reasons why each species was included as a candidate for  
64 each period.

65 The initial 48 bird and 25 mammal accounts were reviewed by experts on the species, as identified  
66 by BirdLife International for birds, and by the Global Mammal Assessment for mammals. We  
67 contacted 197 bird and 77 mammal experts. For birds, we received 88 responses for 45 species  
68 (94%). For mammals, we received 36 responses for 24 species (96%). In some cases, the new  
69 information provided by experts led us to then exclude the species, narrowing our list further to 39  
70 bird and 21 mammal candidate species. Whereas all of these were considered as candidates for  
71 potentially having gone extinct without conservation action during 1993-2020, a shorter list of 23  
72 bird and 17 mammal species was considered for the 2010-2020 period. This was typically because  
73 the population had become sufficiently large, widely distributed, and/or secure by 2010 that it was  
74 implausible that the species would have gone extinct if action had ceased in 2010). One exception to  
75 this was Przewalski's Horse *Equus ferus*. This species was Extinct in the Wild in 1993, and was  
76 included with other species that were assessed as Extinct in the Wild for 1993 - 2020. However, it  
77 was assessed as Critically Endangered in 2008 following successful reintroduction and we therefore  
78 included it as a candidate for the 2010-2020 time period.

### 79 [Delphi exercise](#)

80 The next step involved assigning probabilities that conservation action prevented extinction in the  
81 candidate species, which was done by species conservation experts following a Delphi protocol  
82 (accessible at <https://osf.io/rk4ep/>).

### 83 [Selection of evaluators](#)

84 Potential evaluators were identified from the contributors to Red List Assessments for birds by the  
85 Red List Authority for birds (BirdLife International) and for mammals by the Global Mammal  
86 Assessment team (who coordinate Red List assessments for mammals) based on the criteria set out  
87 below:

- 88 i) Experience of species monitoring and conservation, and an understanding of the  
89 challenges of searching for and detecting rare species AND  
90 ii) This experience spans multiple species AND  
91 iii) Experience of quantifying estimates based on uncertain information (e.g. through  
92 undertaking Red List assessments)

93 Those identified included individuals from a diversity of backgrounds, nationalities, regions, and  
94 gender. A total of 66 evaluators meeting these criteria were invited to participate (31% female, and  
95 30% based in the Global South), of whom 11 were invited to participate in both exercises. 28 bird  
96 and 26 mammal evaluators took part, of which 34% were female, and 23% based in the Global  
97 South. The following authors took part in the Delphi exercise for birds: FCB, LM, CH, MH, RWM,  
98 PJKM, ASLR, HW, YBG, MFC, PAC, BF, SG, JJG, JFL, ACL, LL, SPM, DPM, FMS, LMR, MCR, RJS, PS, TS,  
99 JRSW, RPY, SHMB. The following authors took part in the Delphi exercise for mammals: FCB, LM,  
100 TMB, MH, PJKM, ASLR, CR, JC, MFC, CRD, DOF, CNJ, RJK, SRBK, JFL, DPM, EM, ARP, TJR, NSR, LR, EVD,  
101 PV, JCZW, RPY, SHMB.

#### 102 *Preparation and conducting the Delphi exercise*

103 Ethical approval to undertake this activity was given by Newcastle University, reference number  
104 15388/2018. We followed the IDEA protocol (Investigate, Discuss, Estimate and Aggregate) in which  
105 experts each make an independent, anonymous, quantitative assessment, followed by facilitated  
106 discussion, followed by another quantitative assessment, followed by aggregation of their estimates  
107 (Hemming et al., 2018). In order to do this, each species was evaluated by all bird or all mammal  
108 evaluators. A few evaluators are more involved with the direct management of some species under  
109 consideration, and they might be incentivised to assign high probabilities to those species. However,  
110 as their score was only one out of 28 for bird species, or one out of 26 for mammal species, we did  
111 not consider this to be an issue.

112 Evaluators received instructions and background information for the Delphi technique (see  
113 *Information circulated to evaluators* at the end of this document). The evaluators were sent the  
114 same list of candidate species for birds or mammals, depending on whether they were identified as  
115 evaluators for birds, mammals, or both groups. Each evaluator received lists in which the species  
116 appeared in a different, random order. For each species, the evaluators received the compiled and  
117 revised species information.

118 The questions were based on Morgan (2014) and Hemming et al. (2018), with questions on extreme  
119 values asked first to avoid anchoring (Morgan, 2014). When using qualitative terms to describe  
120 probabilities, there are large differences between individuals in the perceived probability (Morgan,  
121 2014), so we used numerical values instead. To ensure that our questions and background  
122 information on the exercise were not ambiguous, we tested them on eight non-species expert  
123 students/staff at the School of Natural and Environmental Sciences at Newcastle University, UK,  
124 based on five sample species and using the background information prepared for the evaluators. We  
125 took note of any arising questions. The students and staff were asked what their understanding of  
126 the questions was, to ensure our intended meaning was clear to everyone. The information for  
127 evaluators was revised after the exercise. The three questions for all species were:

128 Realistically, what do you think is the **(1) lowest plausible probability/ (2) highest plausible**  
129 **probability/ (3) best estimate for the probability** that conservation action prevented extinction for  
130 this species during the period (i.e. what is the probability that, **if action had ceased in 1993**, and no  
131 subsequent actions were implemented, the species would have gone extinct by 2020)?

132 Additionally, if species met the criteria to be included for the time period 2010 – 2020, the three  
133 following questions were also asked:

134 Realistically, what do you think is the **the (4) lowest plausible probability/ (5) highest plausible**  
135 **probability/ (6) best estimate for the probability** that conservation action prevented extinction for  
136 this species during the period (i.e. what is the lowest plausible probability that, **if action had ceased**  
137 **in 2010**, and no subsequent actions were implemented, the species would have gone extinct by  
138 2020)?

139 We explained that ‘conservation action’ encompassed the full range of interventions, including  
140 protected area establishment and management, legislation (e.g. to prohibit hunting), control or  
141 management of invasive alien species, control of hunting/trapping, habitat restoration, and species  
142 recovery interventions such as captive breeding, translocation, supplementary feeding, nest-site  
143 provision etc. We further clarified that the probabilities should be given by considering if all actions  
144 had ceased, including the degazettement of protected areas, and discontinuing captive breeding  
145 programmes (we include private collections here too). We recognise in practice, it might not be  
146 likely that all actions would cease, for example because there are legal implications in degazetting  
147 protected areas.

148 We also explained that we wanted the scores to reflect whether the species would have gone extinct  
149 in the wild if not for conservation action, meaning that the last individual in the wild would have  
150 disappeared by the beginning of 2020. Species that are listed as Extinct in the Wild on the IUCN Red  
151 List are listed separately in Tables S2 and S3.

152 We used a number of measures to reduce the attrition rate of evaluators: we used an Excel  
153 spreadsheet for the scoring to make this easy for everyone and made the species information  
154 available online. We piloted the exercise beforehand with a team of people to ensure the questions  
155 were not ambiguous and to estimate the time it would take for evaluators to make their scores. We  
156 also selected evaluators who have relevant expertise and interest as defined by our criteria above,  
157 and minimised the time between the iterations of the Delphi process, which was no more than six  
158 weeks between sending out instructions initially and revising the scores (Mukherjee et al., 2015).

### 159 *Measuring consensus*

160 Based on the results first returned by evaluators, we calculated the median lowest (question 1),  
161 highest (question 2) and best estimate (question 3) of probabilities that extinction has been  
162 prevented for each species (von der Gracht, 2012), for both time periods where applicable. We used  
163 medians, as unweighted approaches to combining expert knowledge are usually as accurate as more  
164 complex, weighted approaches (Knol et al., 2010; Martin et al., 2012), and chose medians to avoid  
165 undue influence from any outliers. To measure agreement, we defined seven classes of probability,  
166 based on Keith et al. (2017): very unlikely, quite unlikely, quite possible but unlikely, more likely than  
167 not, quite likely, very likely, virtually certain (see Table S1). We considered there to be high  
168 agreement if >50% of evaluators had placed their estimates within the same class, medium  
169 agreement if >50% of evaluators had placed their estimates within two adjacent classes, and low  
170 agreement for all other cases.

171 *Table S1. Range of probabilities and their meaning for whether extinction was prevented through conservation action*  
172 *(adapted from Keith et al., 2017).*

|                               |                                                               |
|-------------------------------|---------------------------------------------------------------|
| <b>Range of probabilities</b> | <i>Was extinction prevented through conservation actions?</i> |
|-------------------------------|---------------------------------------------------------------|

|             |                                                                                                                                                                                                                                                                                                              |
|-------------|--------------------------------------------------------------------------------------------------------------------------------------------------------------------------------------------------------------------------------------------------------------------------------------------------------------|
| 0.99 - 1.00 | The actions are <b>virtually certain</b> to have prevented extinction, i.e. would have prevented extinction in 99 of 100 species similar to the target. There is a less than a one in a hundred chance that the taxon would have persisted without conservation action during the period.                    |
| 0.90 - 0.98 | The actions are <b>very likely</b> to have prevented extinction, i.e. would have prevented extinction in 49 of 50 to 19 of 20 similar species. There is a one in fifty to one in twenty chance that the taxon would have persisted without conservation action during the period.                            |
| 0.75 - 0.89 | The actions are <b>quite likely</b> to have prevented extinction, i.e. would have prevented extinction in 19 of 20 to three in four similar species. There is a one in twenty to one in four chance that the taxon would have persisted without conservation action during the period.                       |
| 0.50 - 0.74 | The actions are <b>more likely than not</b> to have prevented extinction, i.e. would have prevented extinction of three-quarters of similar species. There is a one in four to 50:50 chance that the taxon would have persisted without conservation action during the period.                               |
| 0.25 - 0.49 | The actions are <b>quite possible but unlikely</b> to have prevented extinction, i.e. would have prevented extinction in one quarter to one half of similar species. There is more than a 50:50 and up to a 3 in 4 chance that the taxon would have persisted without conservation action during the period. |
| 0.10 - 0.24 | The actions are <b>quite unlikely</b> to have prevented extinction, i.e. would have prevented extinction of one tenth to one quarter of similar species. There is a 3 in 4 to 9 in 10 chance that the taxon would have persisted without conservation action during the period.                              |
| 0 - 0.09    | The actions are <b>very unlikely</b> to have prevented extinction, i.e. would have prevented extinction of up to one tenth of similar species. There is more than a 9 in 10 chance that the taxon would have persisted without conservation action during the period.                                        |

173

174 *Scoring and discussion*

175 All evaluators scored all species independently first. We then shared with all evaluators the median  
176 and agreement of scores for each species, for each period. This was followed by teleconference  
177 video calls where we discussed each species in turn. We organised two calls for each of birds and  
178 mammals (to keep the group size sufficiently small to ensure all could contribute, and to address the  
179 evaluators' different time zones). Prior to the calls, each species was randomly assigned to two  
180 evaluators who were asked to familiarise themselves in more depth with the documentation  
181 provided and encouraged to seek any additional information online or offline and consider potential  
182 counterfactuals. During the first call, evaluators worked though the list in alphabetical order, and in  
183 reverse alphabetical order for the second call.

184 During the calls, each species was discussed in turn for no more than 10 minutes, with the discussion  
185 facilitated by one chair (SHMB for birds; MH for mammals). Facilitation included prompting to  
186 consider counterfactuals, choosing contrasting results for discussion and exploring potential reasons  
187 for contrasting results (Hemming et al., 2018). The median and degree of agreement of scores for  
188 each of the two periods were considered in the discussion (but individual scores remained  
189 anonymous). In a few cases where key information was mentioned during the first call which had

190 not been part of the documentation on the species, this information was shared by the chair during  
191 the second call.

192 Following discussion of each species, all evaluators independently and confidentially re-estimated  
193 the probability that extinction had been prevented for each of the two time periods.

#### 194 [Subsequent analysis](#)

195 The revised scores from the calls were used to recalculate median probabilities and agreement  
196 between evaluators (as defined above) for each time period, and these were used in the subsequent  
197 analysis. We summarised the overall results in terms of the number of species whose extinction has  
198 been prevented as X-Y, with X representing species with a median best estimate  $\geq 90\%$  (i.e. very  
199 likely to have had their extinction prevented) and Y representing species with a median best  
200 estimate  $> 50\%$  (i.e. more likely than not to have had their extinction prevented), following an  
201 analogous approach for defining Extinct and Critically Endangered (Possibly Extinct) species  
202 (Butchart et al., 2018). We compared these total numbers with the rate at which extinctions have  
203 been prevented. We also calculated the latter rate as the sum of all best median probabilities across  
204 all candidate species (without setting thresholds), following an analogous approach for estimating  
205 the rate of extinction suggested by Akçakaya et al. (2018).

206 We plotted median probabilities for all candidate species for both time periods, for the lowest, best  
207 and highest estimate of the probability. We compared the scoring between calls for the best  
208 estimate for each species under each relevant time period using Kruskal-Wallis tests, as not all were  
209 normally distributed.

210 We mapped the current native or reintroduced distribution of the species for each country, except  
211 for Extinct in the Wild species, for which we mapped those countries in which they were native prior  
212 to extinction in the wild. We plotted threats, conservation actions, current Red List category and  
213 population trend, including for Extinct in the Wild species. We plotted threats according to IUCN  
214 threat level 1 (Salafsky et al., 2008), except for the threats Biological Resource Use and Natural  
215 Systems Modifications, as they comprise distinct threats. Biological Resource Use was therefore split  
216 into the relevant level 2 threats, namely Hunting and collecting terrestrial animals, Logging & wood  
217 harvesting, and Fishing & harvesting aquatic resources. The category Natural System Modifications  
218 was split into Fire and fire suppression, Dams and water management/use, and Other ecosystem  
219 modifications. We included all actions taking place for all extant and Extinct in the Wild species  
220 based on the IUCN classification scheme (Salafsky et al., 2008), including actions taking place to  
221 prepare for future reintroductions of Extinct in the Wild species. We used the 2019 version 3 IUCN  
222 Red List information in the plots for all species, including the two species that were Extinct in the  
223 Wild in 1993 (Przewalski's Horse *Equus ferus* and Guam Rail *Hypotaenidia owstoni*), and one species  
224 that was Extinct in the Wild in 2010 (Guam Rail *Hypotaenidia owstoni*), but which have been  
225 successfully reintroduced and are extant now (IUCN 2020).

226 We made these plots for those species with a median best probability  $> 50\%$  that their extinction  
227 was prevented for the 1993 - 2020 time period (as shown in the Results), as well as for those species  
228 with a median best probability  $> 50\%$  that their extinction was prevented for the 2010 - 2020 time  
229 period, and for all candidate species (Figures S4 - S10).

230 All code and data can be found at

231 [http://github.com/rbolam/Prevented\\_bird\\_and\\_mammal\\_extinctions](http://github.com/rbolam/Prevented_bird_and_mammal_extinctions).



232 Extended results

233 Extinctions and Extinct in the Wild species

234 Table S2. Bird and mammal species that have become extinct since 1993 (EX, Extinct), or are strongly suspected to have  
 235 done so (CR(PE) – Critically Endangered (Possibly Extinct), i.e. species classified as Critically Endangered which are, on the  
 236 balance of evidence, likely to be extinct, but for which there is a small chance that they may be extant).

| Species                                                     | 2019 Red List category | Estimated date of extinction |
|-------------------------------------------------------------|------------------------|------------------------------|
| <b>Birds</b>                                                |                        |                              |
| Maui Akepa<br><i>Loxops ochraceus</i>                       | CR(PE)                 | 1994                         |
| Least Vermilion Flycatcher<br><i>Pyrocephalus dubius</i>    | EX                     | 1994                         |
| Imperial Woodpecker<br><i>Campephilus imperialis</i>        | CR(PE)                 | 1995                         |
| Aguijan Reed-warbler<br><i>Acrocephalus nijoi</i>           | EX                     | 1996                         |
| Glaucous Macaw<br><i>Anodorhynchus glaucus</i>              | CR(PE)                 | 2001                         |
| Pernambuco Pygmy-owl<br><i>Glaucidium mooreorum</i>         | CR(PE)                 | 2001                         |
| Poo-uli<br><i>Melamprosops phaeosoma</i>                    | EX                     | 2004                         |
| South Island Kokako<br><i>Callaeas cinereus</i>             | CR(PE)                 | 2007                         |
| Cryptic Treehunter<br><i>Cichlocolaptes mazarbarnetti</i>   | EX                     | 2007                         |
| Alagoas Foliage-gleaner<br><i>Philydor novaesi</i>          | EX                     | 2011                         |
| <b>Mammals</b>                                              |                        |                              |
| Telefomin Cuscus<br><i>Phalanger matanim</i>                | CR(PE)                 | 1998                         |
| Yangtze River Dolphin<br><i>Lipotes vexillifer</i>          | CR(PE)                 | 2002                         |
| Miss Waldron’s Red Colobus<br><i>Ptilocolobus waldroni</i>  | CR(PE)                 | 2008                         |
| Christmas Island Pipistrelle<br><i>Pipistrellus murrayi</i> | EX                     | 27 August 2009               |
| Bramble Cay Melomys<br><i>Melomys rubicola</i>              | EX                     | 2009                         |

237

238

239 Table S3. Number of species that went Extinct, for which extinction has been prevented, and the rate at which extinctions  
 240 have been prevented.

|                                                                                                                                        | Birds     | Mammals   | Total     |
|----------------------------------------------------------------------------------------------------------------------------------------|-----------|-----------|-----------|
| Extinctions between 1993-2020                                                                                                          | 10        | 5         | 15        |
| Extinctions between 2010-2020                                                                                                          | 1         | 0         | 1         |
| Species listed as Extinct in the Wild 1993-2020                                                                                        | 6         | 3         | 8         |
| Species listed as Extinct in the Wild 2010-2020                                                                                        | 6         | 2         | 7         |
| Species for which extinction is judged to have been likely in the absence of conservation during 1993-2020 (incl. Extinct in the Wild) | 21 – 32   | 7 – 16    | 28 – 48   |
| Species for which extinction is judged to have been likely in the absence of conservation during 2010-2020 (incl. Extinct in the Wild) | 9 – 18    | 2 – 7     | 11 – 25   |
| Ratio of prevented extinctions to extinctions 1993-2020                                                                                | 3.1 – 4.2 | 2.4 – 4.2 | 2.9 – 4.2 |
| Ratio of prevented extinctions to extinctions 2010-2020                                                                                | 10 – 19   | undefined | 12 – 26   |

241

242 Table S4. Bird and mammal species that are currently Extinct in the Wild. All species are now held in ex situ collections only,  
 243 with the exception of the reintroduced Przewalski's Horse and Guam Rail (see also comments in table).

| Species                                            | Estimated date of extinction in the wild                                                                                                            |
|----------------------------------------------------|-----------------------------------------------------------------------------------------------------------------------------------------------------|
| <b>Birds</b>                                       |                                                                                                                                                     |
| Socorro Dove<br><i>Zenaida graysoni</i>            | 1972                                                                                                                                                |
| Guam Kingfisher<br><i>Todiramphus cinnamominus</i> | 1986                                                                                                                                                |
| Guam Rail<br><i>Hypotaenidia owstoni</i>           | 1987 (this species was reintroduced from 2010, and was re-assessed as Critically Endangered in 2019).                                               |
| Alagoas Curassow<br><i>Mitu mitu</i>               | Late 1980s                                                                                                                                          |
| Spix's Macaw<br><i>Cyanopsitta spixii</i>          | 2000                                                                                                                                                |
| Hawaiian Crow<br><i>Corvus hawaiiensis</i>         | 2002                                                                                                                                                |
| <b>Mammals</b>                                     |                                                                                                                                                     |
| Père David's Deer<br><i>Elaphurus davidianus</i>   | 1900                                                                                                                                                |
| Przewalski's Horse<br><i>Equus ferus</i>           | 1960s (this species was reintroduced from 1994, and was re-assessed as Critically Endangered in 2008. We considered it for time period 2010 - 2020) |
| Scimitar-horned Oryx<br><i>Oryx dammah</i>         | late 1980s-early 1990s                                                                                                                              |

244



245  
246  
247  
248

*Table S5. Number of species by family, for all candidate species, species for which extinction is judged to have been likely to have occurred in the absence of conservation action during 1993-2020, and species for which extinction is judged to have been likely to have occurred in the absence of conservation action during 2010-2020. Ordered alphabetically. Number of candidate species: birds N = 45, mammals N = 24.*

| <b>Family</b>    | <b>Candidate species</b> | <b>1993-2020 extinctions prevented</b> | <b>2010-2020 extinctions prevented</b> |
|------------------|--------------------------|----------------------------------------|----------------------------------------|
| <i>Birds</i>     |                          |                                        |                                        |
| Acrocephalidae   | 1                        | 0                                      | 0                                      |
| Alcedinidae      | 1                        | 1                                      | 1                                      |
| Anatidae         | 2                        | 0                                      | 0                                      |
| Apterygidae      | 1                        | 0                                      | 0                                      |
| Callaeidae       | 1                        | 0                                      | 0                                      |
| Campephagidae    | 1                        | 1                                      | 1                                      |
| Cathartidae      | 1                        | 1                                      | 0                                      |
| Charadriidae     | 1                        | 1                                      | 1                                      |
| Columbidae       | 2                        | 2                                      | 1                                      |
| Corvidae         | 2                        | 2                                      | 2                                      |
| Cracidae         | 2                        | 2                                      | 1                                      |
| Laridae          | 1                        | 0                                      | 0                                      |
| Monarchidae      | 3                        | 3                                      | 2                                      |
| Muscicapidae     | 1                        | 1                                      | 0                                      |
| Otididae         | 1                        | 0                                      | 0                                      |
| Passerellidae    | 2                        | 2                                      | 0                                      |
| Procellariidae   | 3                        | 2                                      | 0                                      |
| Psittacidae      | 9                        | 7                                      | 4                                      |
| Rallidae         | 1                        | 1                                      | 1                                      |
| Recurvirostridae | 1                        | 1                                      | 1                                      |
| Scolopacidae     | 1                        | 0                                      | 0                                      |
| Sturnidae        | 1                        | 1                                      | 1                                      |

|                   |   |   |   |
|-------------------|---|---|---|
| Thamnophilidae    | 1 | 1 | 1 |
| Thraupidae        | 1 | 1 | 1 |
| Threskiornithidae | 2 | 2 | 0 |
| Troglodytidae     | 1 | 0 | 0 |
| Turdidae          | 1 | 0 | 0 |
| <i>Mammals</i>    |   |   |   |
| Bovidae           | 1 | 1 | 1 |
| Callitrichidae    | 2 | 0 | 0 |
| Canidae           | 1 | 1 | 1 |
| Cercopithecidae   | 2 | 1 | 1 |
| Cervidae          | 2 | 1 | 1 |
| Equidae           | 1 | 1 | 0 |
| Felidae           | 1 | 1 | 0 |
| Hylobatidae       | 2 | 2 | 0 |
| Leporidae         | 1 | 0 | 0 |
| Macropodidae      | 2 | 0 | 0 |
| Mustelidae        | 1 | 1 | 1 |
| Phocoenidae       | 1 | 1 | 1 |
| Potoroidae        | 1 | 1 | 0 |
| Rhinocerotidae    | 2 | 1 | 1 |
| Sciuridae         | 2 | 2 | 0 |
| Suidae            | 1 | 1 | 0 |
| Vombatidae        | 1 | 1 | 0 |

249

250

251

252 Further information for species for which extinction is judged to have been likely to  
 253 have occurred in the absence of conservation action during 1993-2020

254 *Table S6. Species judged likely to have become Extinct in the Wild during 1993-2020 in the absence of conservation and for*  
 255 *which captive populations exist.*

| <b>Species held in captivity</b>                      |
|-------------------------------------------------------|
| <i>Birds</i>                                          |
| Asian Crested Ibis <i>Nipponia nippon</i>             |
| Bali Myna <i>Leucopsar rothschildi</i>                |
| Black Stilt <i>Himantopus novaezelandiae</i>          |
| California Condor <i>Gymnogyps californianus</i>      |
| Echo Parakeet <i>Psittacula eques</i>                 |
| Lear's Macaw <i>Anodorhynchus leari</i>               |
| Malherbe's Parakeet <i>Cyanoramphus malherbi</i>      |
| Mariana Crow <i>Corvus kubaryi</i>                    |
| Northern Bald Ibis <i>Geronticus eremita</i>          |
| Orange-bellied Parrot <i>Neophema chrysogaster</i>    |
| Pink Pigeon <i>Nesoenas mayeri</i>                    |
| Puerto Rican Amazon <i>Amazona vittata</i>            |
| Red-billed Curassow <i>Crax blumenbachii</i>          |
| <i>Mammals</i>                                        |
| Black-footed Ferret <i>Mustela nigripes</i>           |
| Iberian Lynx <i>Lynx pardinus</i>                     |
| Przewalski's horse <i>Equus ferus</i>                 |
| Pygmy Hog <i>Porcula salvania</i>                     |
| Red Wolf <i>Canis rufus</i>                           |
| Vancouver Island Marmot <i>Marmota vancouverensis</i> |

256

| Species                                      | Medians for lowest, best and highest scores for 1993 - 2020 | Medians for lowest, best and highest scores for 2010 - 2020 | 1993 population estimate and trend                                                           | 2010 population estimate and trend                                         | 2019 population estimate and trend                                                        | Threats                                                                                                                                              | Conservation actions implemented                                                                                                             | Why it is considered plausible that the species may have gone extinct                                                                                                                                               |
|----------------------------------------------|-------------------------------------------------------------|-------------------------------------------------------------|----------------------------------------------------------------------------------------------|----------------------------------------------------------------------------|-------------------------------------------------------------------------------------------|------------------------------------------------------------------------------------------------------------------------------------------------------|----------------------------------------------------------------------------------------------------------------------------------------------|---------------------------------------------------------------------------------------------------------------------------------------------------------------------------------------------------------------------|
| Alagoas Antwren<br><i>Myrmotherula snowi</i> | 80 - 91 - 99                                                | 70 - 85 - 95                                                | 16-160 mature individuals and a best estimate of 60, at four different sites, and declining. | 30 (range 10-100) mature individuals at one site remaining, and declining. | 12 individuals confirmed in 2019, and a range of 10-20 mature individuals, and declining. | Habitat loss through agriculture, housing, and logging                                                                                               | Protected Areas designated                                                                                                                   | Considering the small and declining population, if the Protected Areas had not protected some of the remnant vegetation, it is plausible that further habitat loss would have led to the extinction of the species. |
| Asian Crested Ibis<br><i>Nipponia nippon</i> | 80 - 90 - 98.5                                              | NA                                                          | 22 - 25 birds, and increasing.                                                               | 780 individuals, and c. 200 mature birds, and increasing.                  | At least c. 500 breeding pairs or 1000 mature birds in 2019, and increasing.              | Habitat loss including wetlands and trees for nesting. Loss of food sources through agrochemical use, and conversion of rice paddies to wheat fields | Ban of agrochemical use, protection and guarding of nesting trees, maintenance of fields during winter for feeding, release of captive birds | The small number of individuals increased rapidly. The main threats were addressed directly, and plausibly led to the increase of the population.                                                                   |

|                                                         |                         |                   |                                                                    |                                                                                                                                                                      |                                                                                                                                                                                    |                                                                                                                                                                                                                                                                  |                                                                                                                                                                                                                |                                                                                                                                                                                                                                                                                 |
|---------------------------------------------------------|-------------------------|-------------------|--------------------------------------------------------------------|----------------------------------------------------------------------------------------------------------------------------------------------------------------------|------------------------------------------------------------------------------------------------------------------------------------------------------------------------------------|------------------------------------------------------------------------------------------------------------------------------------------------------------------------------------------------------------------------------------------------------------------|----------------------------------------------------------------------------------------------------------------------------------------------------------------------------------------------------------------|---------------------------------------------------------------------------------------------------------------------------------------------------------------------------------------------------------------------------------------------------------------------------------|
| Bali Myna<br><i>Leucopsar rothschildi</i>               | 85 - 95<br>- 100        | 80 - 90 -<br>98   | 42 - 48<br>individuals,<br>and<br>decreasing                       | 115 individuals<br>but <50<br>mature<br>individuals,<br>and<br>decreasing, as<br>the population<br>has been<br>maintained<br>only by release<br>of captive<br>birds. | 191<br>individuals in<br>April 2019,<br>with at least<br>100 birds<br>released<br>since October<br>2018,<br>therefore no<br>more than<br>c.50 mature<br>adults, and<br>decreasing. | Illegal trapping<br>for the cage-<br>bird trade, and<br>habitat loss                                                                                                                                                                                             | Release of<br>captive<br>individuals,<br>Protected<br>Area,<br>legislation,<br>sustainable<br>livelihood<br>projects                                                                                           | Considering the intensive<br>conservation actions and<br>the intensity of threat<br>from illegal trapping, but<br>the lack of increase of<br>mature individuals in the<br>population, it is plausible<br>that the species would<br>have gone extinct if not<br>for the actions. |
| Black Stilt<br><i>Himantopus<br/>novaezelandiae</i>     | 72.5 -<br>90 - 99       | 60 - 70 -<br>85   | 60 birds<br>(estimate),<br>and possibly<br>slightly<br>increasing. | 40 individuals,<br>roughly<br>equivalent to<br>27 mature<br>individuals,<br>and increasing                                                                           | 106 adults in<br>2017,<br>including<br>released sub-<br>adults and<br>juveniles,<br>therefore up<br>to 49 mature<br>individuals,<br>and<br>increasing.                             | Predation from<br>both invasive<br>and native<br>species, and<br>habitat loss<br>through<br>agriculture and<br>hydroelectric<br>developments,<br>nest site<br>destruction<br>and<br>disturbance,<br>hybridisation<br>with<br><i>Himantopus<br/>leucocephalus</i> | Captive rearing<br>and release,<br>with over 100<br>individuals<br>released per<br>year in recent<br>years,<br>predator<br>exclusion<br>fencing and<br>trapping<br>around nest<br>sites, control<br>of hybrids | Considering the intense<br>threats to the species, the<br>intensive management of<br>the species by rearing<br>chicks in captivity and<br>then releasing them, and<br>removal of predators<br>around nests have<br>plausibly prevented the<br>extinction of the species.        |
| California Condor<br><i>Gymnogyps<br/>californianus</i> | 92.5 -<br>98.5 -<br>100 | 32.5 -<br>50 - 70 | 4 individuals<br>in the wild,                                      | 104 adults in<br>the wild, of<br>which 44 have                                                                                                                       | 312<br>individuals in<br>the wild in 3                                                                                                                                             | Lead<br>poisoning,<br>persecution,                                                                                                                                                                                                                               | Captive<br>breeding and<br>reintroduction                                                                                                                                                                      | There were only four<br>individuals in the wild in<br>1993, which were still                                                                                                                                                                                                    |

|                                                                   |                    |                |                                                                                 |                                                                                                                              |                                                                                                                                             |                                                                                                                                      |                                                                                                                                                                       |                                                                                                                                                                                                                                                                                                               |
|-------------------------------------------------------------------|--------------------|----------------|---------------------------------------------------------------------------------|------------------------------------------------------------------------------------------------------------------------------|---------------------------------------------------------------------------------------------------------------------------------------------|--------------------------------------------------------------------------------------------------------------------------------------|-----------------------------------------------------------------------------------------------------------------------------------------------------------------------|---------------------------------------------------------------------------------------------------------------------------------------------------------------------------------------------------------------------------------------------------------------------------------------------------------------|
|                                                                   |                    |                | trend unknown.                                                                  | produced viable offspring, and increasing.                                                                                   | meta-populations, and increasing                                                                                                            | electrocution through powerlines, ingestion of plastics and other materials, thinning of eggshells due to DDT                        | programme, food provisioning, ban of lead ammunition and provision of lead-free ammunition, treatment for lead poisoning in wild birds, protection of feeding habitat | threatened by lead poisoning, which is incremental. The release of further birds and intensive management both to reduce the use of lead ammunition, and to treat wild birds with lead poisoning, plausibly prevented the extinction of the species.                                                          |
| Chatham Island Taiko/Magenta Petrel<br><i>Pterodroma magentae</i> | 40 - 62.5 - 80     | 20 - 37.5 - 50 | A presumed total population of 45 - 70 or 100 - 150 individuals, trend unknown. | 18 known breeding pairs by 2012/2013 and 150-200 individuals estimated, trend stable or increasing (some non-genuine change) | In 2018/2019 114 adults were recorded in a season, resulting in a population estimate of 150-200 adults, and a genuine increase since 2014. | Predation of chicks and potentially adults by introduced species, habitat degradation through livestock, uneven sex ratios of adults | Control of invasives, protection of breeding areas, translocation                                                                                                     | In 1993, there were only 4 known breeding pairs. While some of the increase in numbers is due to more burrows being found, there has also been a genuine increase since 2014. Considering the threat by invasives is managed intensively, it is plausible that extinction in this species has been prevented. |
| Echo Parakeet<br><i>Psittacula eques</i>                          | 82.5 - 94.5 - 99.5 | NA             | 16 - 22 birds, including five pairs, and increasing.                            | 300-350 mature individuals estimated at the end of the 2011/2012                                                             | No updated numbers.                                                                                                                         | Severe habitat loss (only 5% of native vegetation remained in 1995) leading                                                          | Captive breeding and release, intensive nest management including                                                                                                     | The population increased from 16 - 22 birds in 1993 to 300 - 350 individuals at the end of the 2011/2012. Severe habitat loss and                                                                                                                                                                             |

|                                              |                |                |                                                                     |                                                                                            |                                                                               |                                                                                                     |                                                                                            |                                                                                                                                                                                                                                               |
|----------------------------------------------|----------------|----------------|---------------------------------------------------------------------|--------------------------------------------------------------------------------------------|-------------------------------------------------------------------------------|-----------------------------------------------------------------------------------------------------|--------------------------------------------------------------------------------------------|-----------------------------------------------------------------------------------------------------------------------------------------------------------------------------------------------------------------------------------------------|
|                                              |                |                |                                                                     | breeding season, and increasing rapidly.                                                   |                                                                               | to loss of food sources and increased interspecific competition for nest sites, predation of chicks | provision of nest boxes and controlling nest predators, habitat management and restoration | predation are being addressed by habitat restoration, captive breeding and release, and nest site provision and protection, and it is plausible that these intensive actions have prevented extinction in this species.                       |
| Fatu Hiva Monarch<br><i>Pomarea whitneyi</i> | 75 - 90 - 98.5 | 75 - 90 - 96.5 | Numbers unknown, but persisting and common in 1990, and decreasing. | 64 individuals estimated in total population in 2009, and declining.                       | 31-36 individuals in 2019, and overall decreasing, but increasing since 2017. | Predation by invasives, some habitat loss                                                           | Intensive control of invasives                                                             | The rapid decline of the species was caused by invasive species, which are now being controlled and the species is increasing since 2017. It is plausible that the species would have gone extinct if not for the intensive predator control. |
| Guadalupe Junco<br><i>Junco insularis</i>    | 75 - 90 - 96.5 | NA             | 100 individuals (presumed), trend unknown.                          | Unknown, but thought to be less than 250 mature individuals, and thought to be increasing. | 10,900 - 39,800 individuals in 2018 and increasing                            | Decline in habitat through intensive grazing by goats, predation by invasives                       | Eradication of goats by 2007, control of cats                                              | The species suffered from lack of habitat which was addressed by the eradication of goats, and its decline was exacerbated by predation, so it is plausible that the actions prevented extinction.                                            |
| Lear's Macaw<br><i>Anodorhynchus leari</i>   | 70 - 85 - 95   | NA             | Around 60 - 100 individuals each in Raso                            | 1,123 birds in Raso da Catarina population                                                 | 1,700 birds in 2018 at Raso da Catarina, and                                  | Illegal trapping and trade, deforestation, persecution for                                          | Improved surveillance to stop illegal trapping and                                         | It is plausible that the species would have been trapped to extinction given one of the                                                                                                                                                       |



|                                                 |                |                |                                                                                                   |                                                                               |                                                                                    |                                                               |                                                                                                                  |                                                                                                                                                                                                         |
|-------------------------------------------------|----------------|----------------|---------------------------------------------------------------------------------------------------|-------------------------------------------------------------------------------|------------------------------------------------------------------------------------|---------------------------------------------------------------|------------------------------------------------------------------------------------------------------------------|---------------------------------------------------------------------------------------------------------------------------------------------------------------------------------------------------------|
|                                                 |                |                | da Catarina and Boqueirão da Onça populations, one of which was increasing, the other decreasing. | which is increasing, 2 in the Boqueirão da Onça population                    | increasing. 2 in the Boqueirão da Onça population                                  | foraging on maize crops                                       | trade, maize replacement scheme for farmers                                                                      | populations declined from 60 - 100 individuals to 2, if not for the actions to stop poaching and smuggling                                                                                              |
| Mangrove Finch<br><i>Geospiza heliobates</i>    | 60 - 70 - 90   | 40 - 60 - 70   | 100 - 200 birds, presumed stable                                                                  | 80-120 mature individuals, and decreasing                                     | 41 birds were observed, and the population estimate is 80 – 100, and is decreasing | Disease, climate change, nest predation                       | Protected Area, control of invasives, captive rearing of young, treatment of nests to reduce number of parasites | The population has declined over the time period, and the species is intensively managed to reduce predation and disease caused by nest parasites. This plausibly prevented extinction in this species. |
| Mariana Crow<br><i>Corvus kubaryi</i>           | 60 - 80 - 95   | 50 - 70 - 85   | 891 individuals on Rota and less than 50 individuals on Guam, and declining rapidly               | 60 confirmed pairs on Rota in 2008, two males on Guam, and decreasing rapidly | 50 breeding pairs in the 2015-2016 breeding season, and decreasing                 | Predation by invasives, habitat loss, direct persecution      | Control of invasives, screening to prevent invasives becoming established                                        | The species went Extinct on Guam due to invasive Brown Tree Snakes, and prevention of these snakes to become established on Rota plausibly prevented extinction in this species.                        |
| Northern Bald Ibis<br><i>Geronticus eremita</i> | 40 - 65.5 - 80 | 17.5 - 30 - 50 | 59 pairs in 1997 following the death of 40 birds in 1996                                          | 105 pairs, but only four mature birds in Syria in 2009, overall stable        | 708 individuals as of 2018, and increasing                                         | Disturbance, agricultural intensification, hunting, poisoning | Protected Areas, community involvement to prevent                                                                | Considering the small population at the beginning of the period, it is plausible that the Protected Area and                                                                                            |

|                                                                                                     |              |                |                                                                              |                                                                                     |                                                 |                                                  |                                                                                                                   |                                                                                                                                                                                                                              |
|-----------------------------------------------------------------------------------------------------|--------------|----------------|------------------------------------------------------------------------------|-------------------------------------------------------------------------------------|-------------------------------------------------|--------------------------------------------------|-------------------------------------------------------------------------------------------------------------------|------------------------------------------------------------------------------------------------------------------------------------------------------------------------------------------------------------------------------|
|                                                                                                     |              |                |                                                                              |                                                                                     |                                                 |                                                  | disturbance, water provisioning, reintroduction                                                                   | community involvement have mitigated threats such as habitat loss and disturbance, and prevented extinction.                                                                                                                 |
| Orange-bellied Parrot<br><i>Neophema chrysogaster</i>                                               | 85 - 95 - 99 | 80 - 90 - 98.5 | 150 estimated, possibly stable                                               | <50 individuals, and decreasing                                                     | Total population was 14 in 2017, and decreasing | Habitat loss, disease, competition and predation | Protection and management of feeding habitat, release of large numbers of captive individuals (partly successful) | Only 14 individuals were remaining as of 2017, after a steady decline. It is plausible that the actions have slowed the decline enough to prevent extinction by 2020.                                                        |
| Orange-fronted Parakeet;<br>Kakariki Karaka;<br>Malherbe's Parakeet<br><i>Cyanoramphus malherbi</i> | 50 - 80 - 90 | 40 - 65 - 80   | Estimate of 150 – 200 individuals in 1999, and likely to have been declining | 450 individuals but uncertainty around the number of mature individuals. Increasing | 380 individuals, and increasing                 | Invasive species, habitat alteration             | Intensive control of invasives, nest site protection, translocation                                               | The species was declining in the early 2000s mainly through predation by invasives. Successful control of these, as well as translocations (one of which was successful) mean it is plausible that extinction was prevented. |
| Pale-headed Brush-finch<br><i>Atlapetes pallidiceps</i>                                             | 75 - 85 - 95 | NA             | 12 - 22 occupied territories in 1999 estimate, and decreasing                | 226 mature individuals, and increasing                                              | Estimate of 90-104 territories, and stable      | Brood parasitism, lack of suitable habitat       | Habitat protection, removal of brood parasites, habitat management                                                | The small population increased rapidly once brood parasites were being removed, which plausibly prevented extinction in this species.                                                                                        |

|                                               |                  |                 |                                                                        |                                                                                                    |                                                                                                                          |                                                                                                                  |                                                                                                                                             |                                                                                                                                                                                                                                                          |
|-----------------------------------------------|------------------|-----------------|------------------------------------------------------------------------|----------------------------------------------------------------------------------------------------|--------------------------------------------------------------------------------------------------------------------------|------------------------------------------------------------------------------------------------------------------|---------------------------------------------------------------------------------------------------------------------------------------------|----------------------------------------------------------------------------------------------------------------------------------------------------------------------------------------------------------------------------------------------------------|
| Pink Pigeon<br><i>Nesoenas mayeri</i>         | 90 - 95<br>- 100 | NA              | Wild population of 20, and introduced population of 28, and increasing | 360-395 individuals in 2005, and roughly stable (fluctuating)                                      | Known population of c.325 to c.410 individuals, and stable                                                               | Habitat loss, predation by invasives                                                                             | Protected Area, habitat restoration, nest protection and control of invasive predators, supplementary feeding, captive breeding and release | The small population increased rapidly due to intensive conservation efforts which plausibly prevented extinction.                                                                                                                                       |
| Puerto Rican Amazon<br><i>Amazona vittata</i> | 90 - 97<br>- 100 | 50 - 70 -<br>85 | 41 birds, and ncreasing                                                | 50-70 individuals in 2 populations, roughly equivalent to 33-47 mature individuals, and increasing | 70-80 wild parrots in the reintroduced population, the original population disappeared following a hurricane. Increasing | Habitat destruction by hurricanes, competition, predation (by native and invasive species), parasitism of chicks | Nest site and food provision, control of nest predators and competitors, captive breeding and release, habitat protection                   | The original population went extinct following a hurricane in 2017, leaving only the reintroduced population, and many other conservation actions are addressing threats directly. It is therefore plausible that actions have prevented its extinction. |
| Rarotonga Monarch<br><i>Pomarea dimidiata</i> | 75 - 90<br>- 95  | NA              | 60 individuals, and increasing                                         | 380 birds estimated in 2011, and increasing                                                        | 500 mature individuals estimated, and increasing                                                                         | Invasive species                                                                                                 | Intensive control of invasives, translocation                                                                                               | The population has been increasing. The key threat of invasives is being addressed by intensive control during the breeding season, and it is plausible this prevented extinction in this species.                                                       |

|                                                            |                |                |                                                                            |                                                        |                                                            |                                                                           |                                                                                                 |                                                                                                                                                                                                                         |
|------------------------------------------------------------|----------------|----------------|----------------------------------------------------------------------------|--------------------------------------------------------|------------------------------------------------------------|---------------------------------------------------------------------------|-------------------------------------------------------------------------------------------------|-------------------------------------------------------------------------------------------------------------------------------------------------------------------------------------------------------------------------|
| Red-billed Curassow<br><i>Crax blumenbachii</i>            | 35 - 60 - 80   | NA             | No population estimates, but considered very small and possibly decreasing | Around 500 native individuals, and possibly decreasing | Around 500 individuals, and different estimates for trends | Habitat loss, hunting                                                     | Protected Areas, reintroductions                                                                | Habitat loss is a key threat to this species, exacerbated by hunting, and the species is now largely restricted to actively protected reserves. It is therefore plausible that extinction has been prevented.           |
| Reunion Cuckooshrike<br><i>Lalage newtoni</i>              | 60 - 76.5 - 90 | 30 - 57.5 - 75 | 120 pairs, and stable                                                      | 30 pairs and decreasing                                | 33 pairs in 2013, and decreasing                           | Predation and competition with invasives, poaching, disease, habitat loss | Habitat protection and management, control of invasives, control of hunting, curbing of tourism | The species has been declining, and suffers from a wide range of threats. Intensive conservation actions have plausibly prevented its extinction.                                                                       |
| Seychelles Magpie-robin<br><i>Copsychus sechellarum</i>    | 77.5 - 90 - 99 | 15 - 39 - 53   | 46 birds on one island in 1994, and increasing                             | 207 individuals on five islands, and increasing        | 283 birds on 5 islands in 2015, and increasing             | Invasives, predation, pesticide use                                       | Translocations to predator-free islands, control of invasives, ban of pesticide use             | The population increased and due to translocation the species now exists on five rather than one island. In addition, invasives were controlled and pesticides banned, plausibly preventing extinction in this species. |
| Southern Red-breasted Plover<br><i>Charadrius obscurus</i> | 75 - 90 - 96.5 | 50 - 65 - 80   | 60-65 individuals, and declining                                           | Estimated at 288 individuals, and fluctuating          | Estimated at 170 individuals. Decreasing rapidly between   | Invasive species                                                          | Control of invasives, which intensified after species decreased                                 | The species went extinct on one island due to invasive species, which are a threat elsewhere too. Intensive control of invasives make it plausible                                                                      |

|                                                      |                  |                |                                                     |                                                                                                                                  |                                           |                                                                                          |                                                                                                             |                                                                                                                                                                                                                                                                                                                                              |
|------------------------------------------------------|------------------|----------------|-----------------------------------------------------|----------------------------------------------------------------------------------------------------------------------------------|-------------------------------------------|------------------------------------------------------------------------------------------|-------------------------------------------------------------------------------------------------------------|----------------------------------------------------------------------------------------------------------------------------------------------------------------------------------------------------------------------------------------------------------------------------------------------------------------------------------------------|
|                                                      |                  |                |                                                     |                                                                                                                                  | 2012 - 2016, but now increasing.          |                                                                                          | rapidly since 2012                                                                                          | that extinction has been prevented.                                                                                                                                                                                                                                                                                                          |
| Tahiti Monarch<br><i>Pomarea nigra</i>               | 77.5 - 90 - 97.5 | 60 - 80 - 90   | Several pairs in 4 different valleys, trend unknown | 35 individuals, and increasing                                                                                                   | 79 mature individuals, and increasing     | Habitat loss and invasive species, which are causing habitat changes and predation       | Control of invasive plants and animals, and planting of food plants                                         | The species had a small population that was facing many threats, including habitat loss and invasive species. Actions have addressed these threats, particularly the invasives, and the species is now increasing. Therefore extinction was plausibly prevented.                                                                             |
| Yellow-eared Parrot<br><i>Ognorhynchus icterotis</i> | 62.5 - 80 - 90   | NA             | Few records of this species, and declining          | In Colombia, 1,103 individuals including 106 adult pairs and increasing. In Ecuador, the last individuals were reported in 1998. | 2,601 individuals in 2019, and increasing | Habitat loss, especially loss of wax palms as the main habitat for this species, hunting | Habitat protection and restoration, awareness campaign to stop the use of wax palm, provision of nest boxes | The species recovered from just a few individuals to over 2,000 by 2019. There was little habitat remaining, and the species was hunted, but habitat protection and restoration have been very successful alongside a public awareness campaign and ban of the use of wax palms. The actions plausibly prevented extinction in this species. |
| Zino's Petrel<br><i>Pterodroma madeira</i>           | 25 - 57.5 - 75   | 12.5 - 30 - 50 | 20 - 30 known pairs, and stable                     | 130-160 individuals estimated, and stable                                                                                        | 200 individuals, and stable               | Predation by invasives (on one occasion)                                                 | Control of invsive species                                                                                  | The population increase is partly due to increased search effort, but some genuine change is also                                                                                                                                                                                                                                            |

|                                                |               |                |                                                                                                                                                                         |                                                                                                                              |                                                                                                                                    |                                                                                                                   |                                                                             |                                                                                                                                                                                                                                                                                             |
|------------------------------------------------|---------------|----------------|-------------------------------------------------------------------------------------------------------------------------------------------------------------------------|------------------------------------------------------------------------------------------------------------------------------|------------------------------------------------------------------------------------------------------------------------------------|-------------------------------------------------------------------------------------------------------------------|-----------------------------------------------------------------------------|---------------------------------------------------------------------------------------------------------------------------------------------------------------------------------------------------------------------------------------------------------------------------------------------|
|                                                |               |                |                                                                                                                                                                         |                                                                                                                              |                                                                                                                                    | a cat killed 10 birds), fire                                                                                      |                                                                             | recorded. Invasive species are the main threat and have been controlled, plausibly preventing extinction.                                                                                                                                                                                   |
| <b>Mammals</b>                                 |               |                |                                                                                                                                                                         |                                                                                                                              |                                                                                                                                    |                                                                                                                   |                                                                             |                                                                                                                                                                                                                                                                                             |
| Black-footed Ferret<br><i>Mustela nigripes</i> | 90 - 95 - 100 | 40 - 60 - 72.5 | The species was Extinct in the Wild, and by 1993 there were approximately 10-20 reintroduced ferrets. Trend unknown as species was only reintroduced 2 years previously | 448 breeding adults in 2009 which declined to 274 in 2012                                                                    | 112 breeding adults recorded in 2019, but due to incomplete survey efforts actual number is probably closer to 240, and decreasing | Disease which affected both ferrets as well as their main prey base, risk of inbreeding, lack of suitable habitat | Ongoing release of captive-bred individuals                                 | The species was reintroduced just prior to 1993, and through ongoing releases first increased, but has been decreasing again since 2009. There are substantial reintroduction efforts ongoing, with 148 kits released in 2019 for example, plausibly preventing extinction in this species. |
| Cao-vit Gibbon<br><i>Nomascus nasutus</i>      | 40 - 60 - 80  | 20 - 37.5 - 60 | This species was thought to be possibly extinct, but a surviving population was found in 2002                                                                           | 2005 population estimate of 35-37 individuals in Vietnam, and at least 10 individuals found in China in 2006, and decreasing | Overall population of 129, trend unknown                                                                                           | Habitat loss for charcoal, grazing, and cultivation; hunting                                                      | Habitat conservation and reduction of charcoal use, patrols to stop hunting | The species persisted until 2002, when it was rediscovered. Actions have addressed the main threats by protecting habitat and patrolling to stop hunting, hence extinction has plausibly been prevented.                                                                                    |
| Cat Ba Langur                                  | 60 - 75 - 90  | 40 - 55 - 75   | 104 to 135 individuals in                                                                                                                                               | Estimate of 50, trend unknown                                                                                                | Total population of                                                                                                                | Poaching led to severe declines                                                                                   | Controls to stop poachers,                                                  | The species declined rapidly due to poaching,                                                                                                                                                                                                                                               |

|                                                |                |                |                                                              |                                                                          |                                                                               |                                                                                                      |                                                                       |                                                                                                                                                                                                                                        |
|------------------------------------------------|----------------|----------------|--------------------------------------------------------------|--------------------------------------------------------------------------|-------------------------------------------------------------------------------|------------------------------------------------------------------------------------------------------|-----------------------------------------------------------------------|----------------------------------------------------------------------------------------------------------------------------------------------------------------------------------------------------------------------------------------|
| <i>Trachypithecus poliocephalus</i>            |                |                | 1999/2000, and declining                                     |                                                                          | 67 individuals, and approximately 35 mature individuals, trend unknown        | and small population is at risk of inbreeding effects; habitat destruction                           | protected areas                                                       | which is now being controlled. It occurs in Protected Areas. Therefore extinction has plausibly been prevented.                                                                                                                        |
| Gilbert's Potoroo<br><i>Potorous gilbertii</i> | 95 - 100 - 100 | 25 - 40 - 65   | 30 or less in 1999 in one population, trend unknown          | 60 - 100 mature individuals in two subpopulations, and stable            | 45 individuals in one population. Stable as of 2019, but declining previously | Predation by introduced species, risk of fire which led to extinction of original population in 2015 | Predator control, translocation onto predator-free island             | This species has had low numbers, and the threat of fire is so severe that the original population went extinct. A translocated population was established prior to 2010 and remains, plausibly preventing extinction in this species. |
| Hainan Gibbon<br><i>Nomascus hainanus</i>      | 50 - 80 - 95   | 30 - 50 - 70   | Three groups with less than 20 individuals, and decreasing   | 20 individuals in two groups, with some solitary individuals, and stable | More than 25 individuals, and stable                                          | Hunting, lack of suitable habitat, small population size                                             | Entire range within a Protected Area                                  | This species has a small population size, which seems to be stable. It is threatened by poaching and lack of habitat. As its entire range is within a protected area, it is plausible that this prevented its extinction.              |
| Iberian Lynx<br><i>Lynx pardinus</i>           | 50 - 80 - 90   | 20 - 32.5 - 50 | 725 mature individuals in 1985, and 65 mature individuals in | Estimate of 130, and increasing                                          | Estimate of 320 for 2018, and increasing                                      | Strong dependence on rabbit as a prey base which had declined due                                    | Actions to boost rabbit numbers, reduce road casualties, education to | This species declined rapidly and is facing many threats, which are being tackled comprehensively. It is now increasing, and it is plausible that                                                                                      |



|                                                            |               |                |                                |                                 |                                               |                                                                                                                                                        |                                                                                                                                            |                                                                                                                                                                                                                                                                                                                   |
|------------------------------------------------------------|---------------|----------------|--------------------------------|---------------------------------|-----------------------------------------------|--------------------------------------------------------------------------------------------------------------------------------------------------------|--------------------------------------------------------------------------------------------------------------------------------------------|-------------------------------------------------------------------------------------------------------------------------------------------------------------------------------------------------------------------------------------------------------------------------------------------------------------------|
|                                                            |               |                | 2001, hence decreasing         |                                 |                                               | to disease, shooting and trapping, road casualties, lack of habitat, habitat loss, small populations showing poor reproduction and genetic performance | stop trapping, translocations to stop inbreeding and many reintroduction projects, protected areas                                         | extinction has been prevented.                                                                                                                                                                                                                                                                                    |
| Javan Rhinoceros<br><i>Rhinoceros sondaicus</i>            | 80 - 90 - 100 | 50 - 75 - 87.5 | 35 - 50, and possibly stable   | 40 - 60, and possibly stable    | A minimum of 67, and stable                   | Poaching                                                                                                                                               | Listed on CITES, protected areas, rhino protection units to stop poachers                                                                  | The severe threat from poaching means that it is plausible the small population could have been hunted to extinction, if not for efforts to stop poachers.                                                                                                                                                        |
| Northern Hairy-nosed Wombat<br><i>Lasiorhinus krefftii</i> | 50 - 80 - 95  | 20 - 32.5 - 55 | Estimate of 65, and increasing | Estimate of 162, and increasing | 2016 estimate of 245, and probably increasing | Competition with grazing animals, predation, inbreeding                                                                                                | Fence to exclude predators, translocation to establish a second population, cutting of introduced flora to promote growth of native flora, | The species faces different threats which are being addressed through intensive management such as fences to exclude predators, a successful translocation to establish a 2nd population, and removal of invasive plants to increase native vegetation, hence it is plausible that extinction has been prevented. |

|                                                               |                |              |                                                                                         |                                                                    |                                                                                     |                                                                                  |                                                                                                    |                                                                                                                                                                                                                                                                                                                         |
|---------------------------------------------------------------|----------------|--------------|-----------------------------------------------------------------------------------------|--------------------------------------------------------------------|-------------------------------------------------------------------------------------|----------------------------------------------------------------------------------|----------------------------------------------------------------------------------------------------|-------------------------------------------------------------------------------------------------------------------------------------------------------------------------------------------------------------------------------------------------------------------------------------------------------------------------|
|                                                               |                |              |                                                                                         |                                                                    |                                                                                     |                                                                                  | water provisioning                                                                                 |                                                                                                                                                                                                                                                                                                                         |
| Northern Idaho Ground Squirrel<br><i>Uroditellus brunneus</i> | 30 - 55 - 70   | NA           | 5,000 individuals in 1985 which decreased to 450 to 500 individuals at 22 sites in 2002 | 1,560 across 56 sites, and increasing                              | 2,659 individuals, and less than 1,000 breeding adults, in 2016, and increasing     | Habitat loss and fragmentation, competition, shooting and poisoning              | Habitat management, regulatory changes that may have reduced the threat of shooting and poisoning. | The species was declining rapidly, and the threat of habitat loss has been managed since, plausibly preventing extinction in this species.                                                                                                                                                                              |
| Pygmy Hog<br><i>Porcula salvania</i>                          | 50 - 70 - 80   | 20 - 40 - 60 | In the mid-1990s the population was between 400 and 500 individuals, and declining      | The total population may have been ca. 300 in the wild, and stable | 100 hogs at release site, and stable (presumably original population is persisting) | Habitat loss through agriculture, forestry, human settlements, and flood control | Habitat protection, translocation                                                                  | The severe pressure on habitats led to a loss of some populations prior to 1993, and could plausibly have driven the species to extinction if not for habitat protection efforts.                                                                                                                                       |
| Red Wolf<br><i>Canis rufus</i>                                | 65 - 85 - 96.5 | 40 - 60 - 80 | 50, and increasing                                                                      | more than 150 animals in 2005, trend in 2010 decreasing            | Now restricted to federal lands, with 20 - 30 individuals, and declining            | Hybridisation with coyotes, illegal killing                                      | Reintroduction , Protected Areas                                                                   | The species was reintroduced prior to 1993, and it increased in number until 2005. Threats are hybridisation with coyotes, and illegal killing of wolves which has increased as a result of conflicts with landowners. The species is now only protected in three wildlife refuges. Extinction was plausibly prevented. |

|                                                          |                |                 |                                                                                                                |                                                                                                     |                                                                                          |                                                                               |                                                                                               |                                                                                                                                                                                                                                                                          |
|----------------------------------------------------------|----------------|-----------------|----------------------------------------------------------------------------------------------------------------|-----------------------------------------------------------------------------------------------------|------------------------------------------------------------------------------------------|-------------------------------------------------------------------------------|-----------------------------------------------------------------------------------------------|--------------------------------------------------------------------------------------------------------------------------------------------------------------------------------------------------------------------------------------------------------------------------|
| Vancouver Island Marmot<br><i>Marmota vancouverensis</i> | 50 - 72.5 - 90 | 20 - 45 - 60    | Estimated 300-350 individuals in 1986, followed by precipitous decline and near-extinction in the wild by 2000 | In 2007 it was estimated that there were about 85 individuals remaining in the wild, and decreasing | 140-190 in 2017, based on field counts, and decreasing                                   | Ecosystem modification, native predators and invasives                        | Captive breeding programme and releases                                                       | This species appears to fluctuate dramatically. The population has been reinforced by releases of captive bred marmots, resulting in now two meta-populations, which plausibly prevented extinction.                                                                     |
| Vaquita<br><i>Phocoena sinus</i>                         | 65 - 90 - 100  | 50 - 77.5 - 100 | In 1997 abundance was estimated to be 567, and declining                                                       | 245, and declining                                                                                  | 6 individuals recorded in summer 2018, and population estimate of 10 - 22, and declining | Illegal fishing for Totoaba causes the species to get tangled in nets and die | Ban on fishing totoaba, removal of illegal fishing gear, provision of alternative livelihoods | The species rapidly declined due to intensive fishing pressure in which it dies as bycatch. Despite bans and removal of fishing gear, fishing is ongoing. It is plausible that the actions have slowed the decline somewhat, and therefore prevented extinction by 2020. |

258

259

260 Plots for species for which extinction is judged to have been likely to have occurred in  
261 the absence of conservation action during 2010-2020

a) Birds

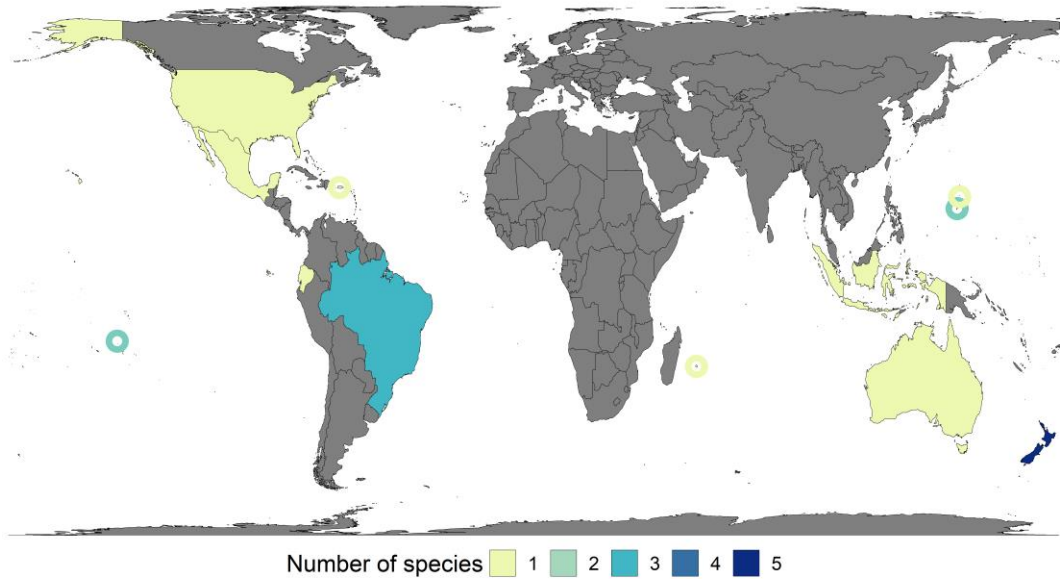

b) Mammals

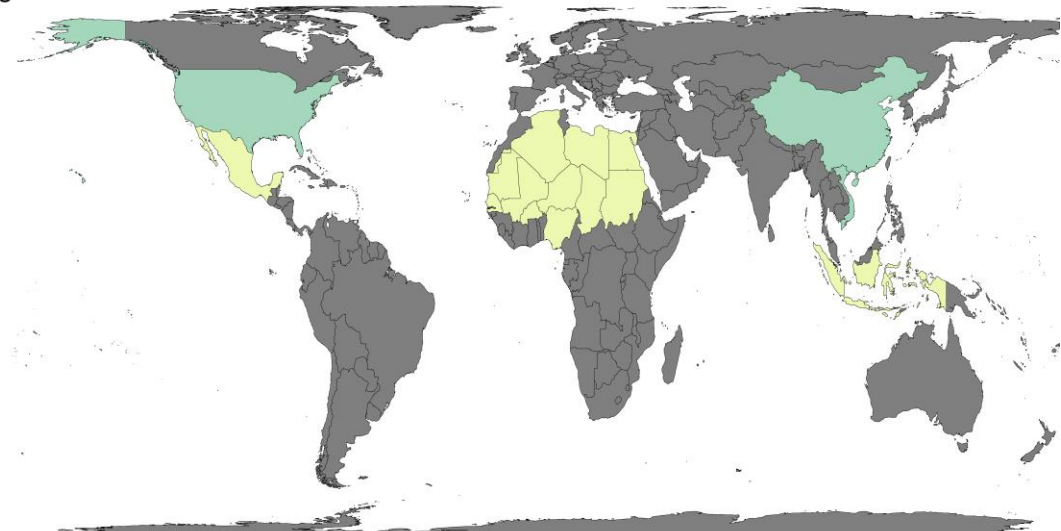

262

263 *Figure S1. Number of (a) bird (N = 18) and (b) mammal (N = 7) species for which extinction is likely to have occurred (i.e.*  
264 *median probability >50%) in the absence of conservation action during 2010-2020, per country. Circles show small island*  
265 *nations and overseas territories, and are coloured according to the key. Species listed as Extinct in the Wild (IUCN, 2020)*  
266 *were mapped in the last countries where they occurred, or are presumed to have occurred.*

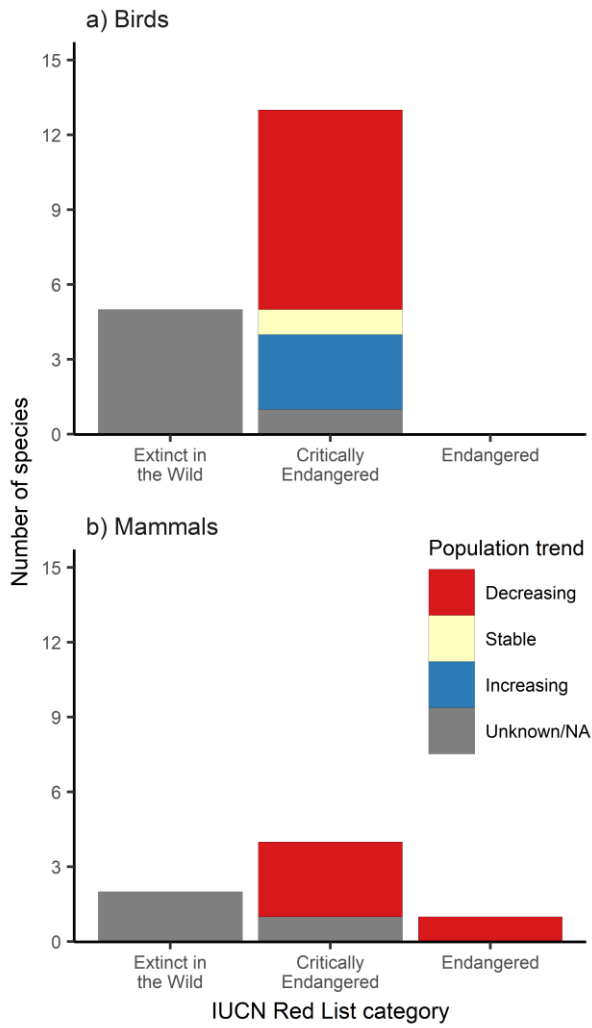

267

268 *Figure S2. 2019 IUCN Red List categories and population trends of (a) bird (N = 18) and (b) mammal (N = 7) species for*  
 269 *which extinction is judged to have been likely (i.e. median probability >50%) to have occurred in the absence of conservation*  
 270 *action, during 2010-2020.*

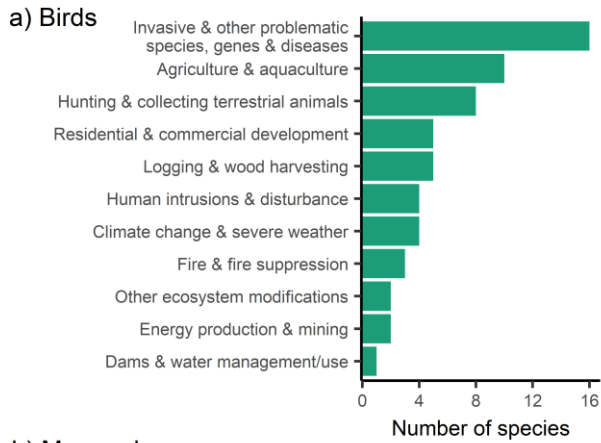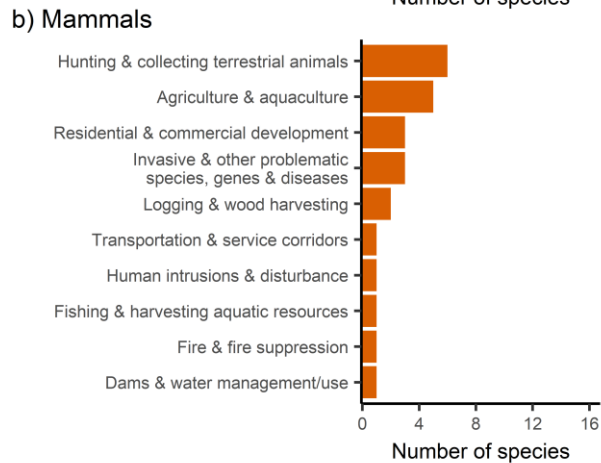

271

272 *Figure S3. Current and past threats to (a) bird (N = 18) and (b) mammal (N = 7) species for which extinction is judged to*  
 273 *have been likely (i.e. median probability >50%) to have occurred in the absence of conservation action during 2010-2020.*  
 274 *Threats are taken from the IUCN threat classification scheme level 1 (Salafsky et al., 2008).*

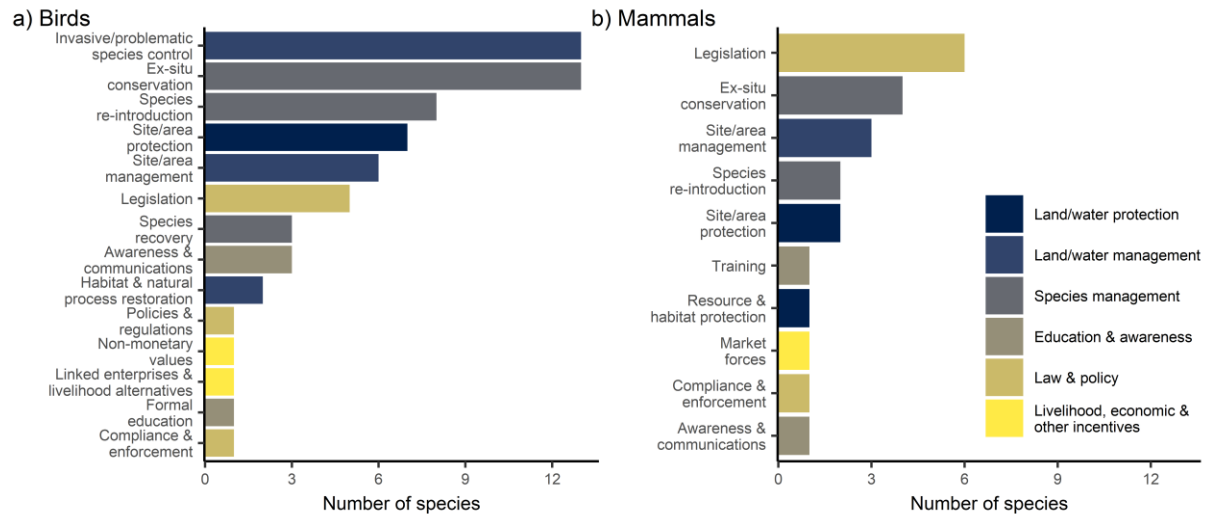

275

276 *Figure S4. Conservation actions for (a) bird (N = 18) and (b) mammal (N = 7) species for which extinction is judged to have*  
 277 *been likely (i.e. median probability >50%) to have occurred in the absence of conservation action during 2010-2020. Actions*  
 278 *are taken from the IUCN action classification scheme level 2, while colours denote level 1 (Salafsky et al., 2008). Both in-situ*  
 279 *and ex-situ actions are included for species that are Extinct in the Wild.*

280

281 Plots for candidate species

a) Birds

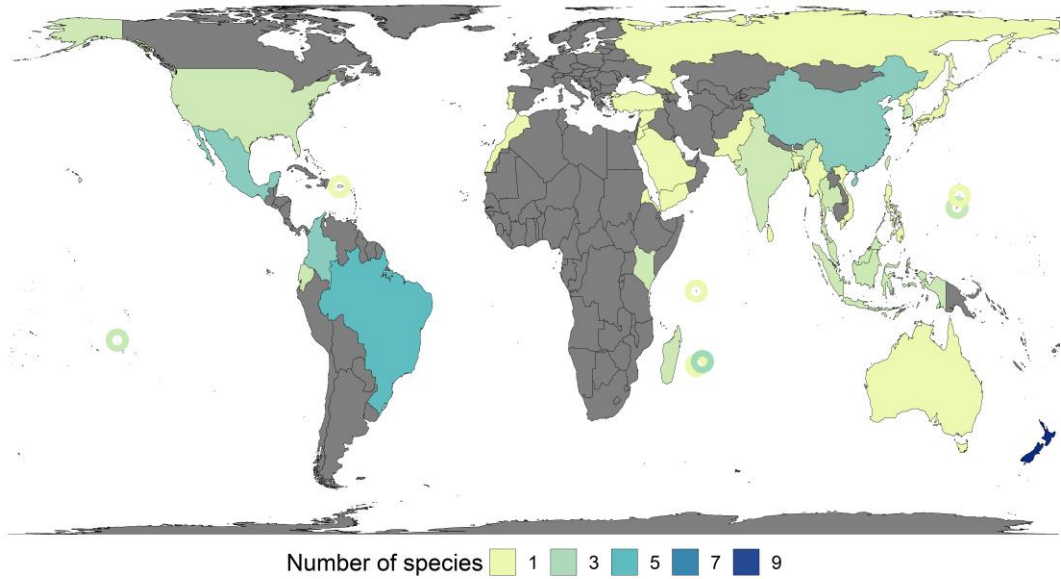

b) Mammals

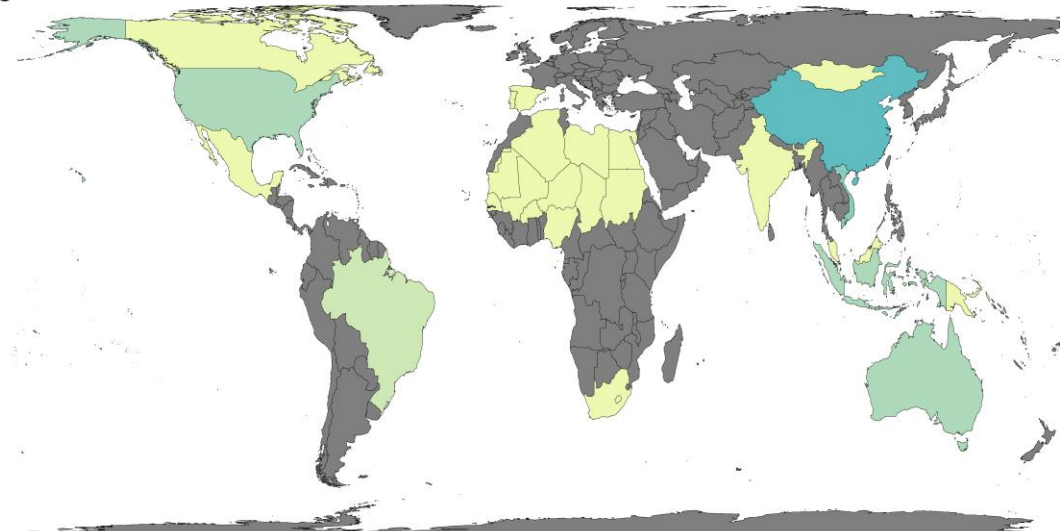

282

283 *Figure S5. Number of (a) bird (N = 45) and (b) mammal (N = 24) candidate species per country. Circles show small island*  
284 *nations and overseas territories, and are coloured according to the key. Species listed as Extinct in the Wild (IUCN, 2020)*  
285 *were mapped in the last countries where they occurred, or are presumed to have occurred.*

286



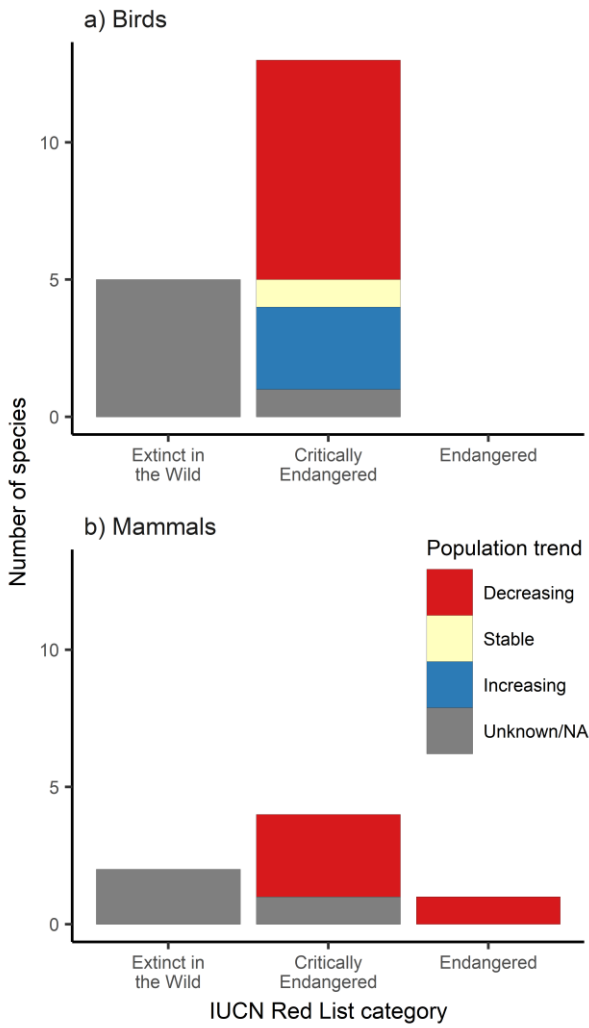

287

288

289

Figure S6. 2019 IUCN Red List categories and population trends of (a) bird (N = 45) and (b) mammal (N = 24) candidate species.

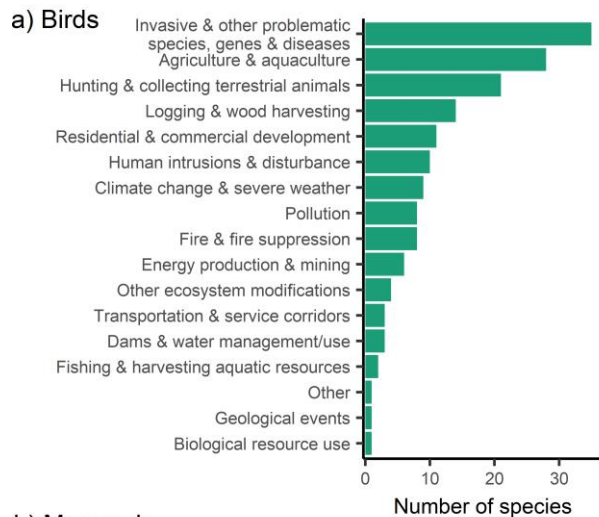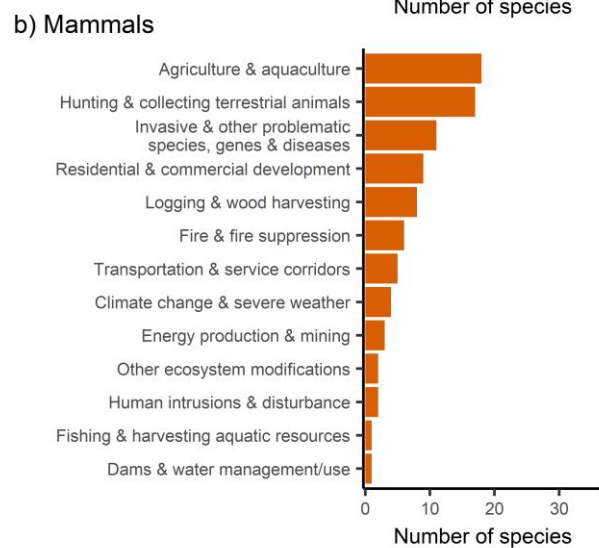

290

291 *Figure S7. Current and past threats to (a) bird (N = 45) and (b) mammal (N = 24) candidate species. Threats are taken from*  
 292 *the IUCN threat classification scheme level 1 (Salafsky et al., 2008).*

### 293 Comparison between calls

294 We compared the scores between the two conference calls for each species and each time period.  
 295 Species of note are those where the overall median best estimate is different to the median best  
 296 estimate from the second call, because new information gained during the first call was available to  
 297 evaluators on the second call, but not vice versa.

298 Of the 39 birds for 1993 - 2020, there were significant differences in the best estimates for Alagoas  
 299 Antwren, Chatham Parakeet, Taita Thrush, and Yellow-eared Parrot. This difference would have  
 300 resulted in exclusion if only the second call had been considered for only one of those species:  
 301 **Yellow-eared Parrot**, with an overall median of 80%, a median of 90% for the first call, and of 25%  
 302 for the second call. An additional species with no significant difference, but for which inclusion  
 303 changed, was **Zino's Petrel**, with an overall median of 57.5%, a median of 65% for the first call, and  
 304 of 45% for the second call. Of the 17 birds for 2010 - 2020, there were significant differences only for  
 305 Townsend's Shearwater, but no impacts in which species scored >50%.

306 Of the 22 mammals for 1993 - 2020, there were significant differences for Cat Ba Langur, Riverine  
 307 Rabbit, and Vancouver Island Marmot. A species with no significant difference, but for which  
 308 inclusion changed, was **Delacour's Langur**, with an overall median of 50%, a median of 40% for the

309 first call, and of 60% for the second call. Of the 17 mammals for 2010 - 2020, there were significant  
310 differences for Cat Ba Langur, Northern Hairy-nosed Wombat, Pygmy Hog, Tenkile, and Vancouver  
311 Island Marmot. The inclusion only changed for **Pygmy Hog** for 2010 - 2020, with an overall median of  
312 40%, a median of 20% for the first call, and of 52.5% for the second call. An additional species with  
313 no significant difference, but for which inclusion changed, was **Red Wolf**, with an overall median of  
314 60%, a median of 75% for the first call, and of 50% for the second call.

## 315 [Information gained during or after the second calls](#)

### 316 **Yellow-eared Parrot**

317 The Yellow-Eared Parrot population at Roncesvalles in the Western Andes has received conservation  
318 action, and was the only known population up until 2009. During the second conference call, a  
319 further population of Yellow-Eared Parrot in the Eastern Andes was mentioned (Murcia-Nova et al.,  
320 2009), and the possibility that the species may have persisted elsewhere in its range in the Western  
321 Andes (Renjifo et al., 2014), which led evaluators to give lower scores compared with the first call.  
322 There were no direct management actions taking place for these populations at the time of their  
323 discovery, but an awareness campaign taking place nationally may have also benefitted those  
324 populations by reducing habitat loss and hunting. By 2009, the Roncesvalles population had  
325 increased in size and small flocks would start to recolonise other areas. It is therefore possible that  
326 the populations in the Western Andes originate from the population at Roncesvalles, though there is  
327 no direct evidence for this. There are different opinions as to the origin of the population in the  
328 Eastern Andes. In the original description of when the population was found, it is mentioned that  
329 local people have known about this parrot population since the 1960s (Murcia-Nova et al., 2009),  
330 and another source details that this population also differs in the type of palms used by the species  
331 (Renjifo et al., 2014). Another source states that it is possible for this population to originate from  
332 the Roncesvalles population, which is 170km apart (Salaman et al., 2019).

### 333 **Zino's Petrel**

334 One evaluator argued that it is possible this species would have persisted without action. There was  
335 some non-genuine change recorded as the searching efforts for nest sites were increased. Some  
336 nests may have been successful without conservation as invasive species may not have been able to  
337 get to all of the petrel nests due to the inaccessible nature of its preferred nest sites.

### 338 **Pygmy Hog**

339 It was mentioned during the second call that the habitat of this species is under intense pressure.  
340 While conservation actions in the 1990s were ineffective, action was ramped up in the early 2000s,  
341 without which it is possible that all remaining habitat would have been lost.

### 342 **Red Wolf**

343 On the first mammal call, the current population of Red Wolf was understood to include only those  
344 individuals reintroduced in North Carolina. However, during the second call, it was mentioned that a  
345 second population of Red Wolf survived. One of the evaluators conveyed that Red Wolf DNA had  
346 been found in a pack of wolves on Galveston Island, an unprotected island off the coast of Texas.  
347 Although this population is clearly admixed (coyote and Red Wolf), genetic results suggest the  
348 animals are more close to captive Red Wolves than south-eastern coyotes (Heppenheimer et al.,  
349 2018 ). This introduced some uncertainty as to whether or not Red Wolf would have gone extinct in  
350 the absence of conservation, with this uncertainty increased due to the taxonomic ambivalent status  
351 of this population. It was noted that Red Wolves themselves have an ambivalent taxonomic status,

352 but recent evidence has concluded that the Red Wolf should be considered a distinct species from  
353 the Grey Wolf and Coyote with likely historical admixture (National Academies of Sciences,  
354 Engineering, and Medicine 2019).

### 355 Comparison of results

356 Some of our results differ from those of Hoffmann et al. (2015), who estimated change in extinction  
357 risk for the world's ungulates in a scenario where all conservation ended between 1996 and 2008.  
358 Both studies consider that *Rhinoceros sondaicus* and *Equus ferus* would have become extinct (Extinct  
359 or Extinct in the Wild). However, whereas Hoffmann et al. assigned a category of Extinct as the best  
360 estimate for *Axis kuhlii* and *Rhinoceros unicornis*, the current study assigns them a lower probability  
361 of extinction due to new information that has become available since 2015. Finally, Arabian Oryx  
362 *Oryx leucoryx* was considered to have gone extinct by Hoffmann et al., (2015), but was excluded in  
363 our exercise during the process of identifying the candidate list of mammals. The 2003 Red List  
364 account of this species details that there were 886 individuals in 5 populations, which had increased  
365 to 1,220 individuals as of 2017 (850 mature individuals), and that these populations were stable or  
366 decreasing (IUCN SSC Antelope Specialist Group, 2017), which is why it was excluded. However,  
367 considering the findings from Hoffmann et al. (2015) we recognise that this species should have  
368 been included in our expert elicitation exercise.

369 Some of our results also differ from Young et al. (2014) who considered the counterfactual Red List  
370 assessment if actions had ceased for the time period 1988 - 2012. Both their and our results indicate  
371 that extinction or extinction in the wild has been prevented for Pink Pigeon *Nesoenas mayeri* and  
372 Echo Parakeet *Psittacula eques*. However, they also considered the extinction of Rodrigues warbler  
373 *Acrocephalus rodericanus* to have been avoided, whereas this species was given a median  
374 probability <50% in our Delphi exercise. We did not include Mauritius Kestrel *Falco punctatus* in our  
375 analysis, because most actions ceased in 1994 when the population was at 222-286 individuals  
376 (BirdLife International 2016). We did not consider Rodrigues Fody *Foudia flavicans* as it was at worst  
377 Vulnerable for the time period under consideration. Its population was increasing in 1993, and  
378 presumably between the 1983 estimate of 110 birds and 1999 estimate of 334 - 500 pairs (911 -  
379 1,200 individuals).

### 380 Additional references

381 BirdLife International (2016). *Falco punctatus*. The IUCN Red List of Threatened Species 2016:  
382 e.T22696373A93557909. [https://dx.doi.org/10.2305/IUCN.UK.2016-](https://dx.doi.org/10.2305/IUCN.UK.2016-3.RLTS.T22696373A93557909.en)  
383 [3.RLTS.T22696373A93557909.en](https://dx.doi.org/10.2305/IUCN.UK.2016-3.RLTS.T22696373A93557909.en) Downloaded on 05 February 2020.

384 Butchart, S. H. M., Akçakaya, H. R., Chanson, J., Baillie, J. E. M., Collen, B., Quader, S., ... Mace, G. M.  
385 (2007) Improvements to the Red List Index. PLoS ONE 2: e140. doi: 10.1371/journal.pone.0000140

386 Diamond, I.R., Grant, R.C., Feldman, B.M., Pencharz, P.B., Ling, S.C., Moore, A.M. & Wales, P.W.  
387 (2014). Defining consensus: a systematic review recommends methodologic criteria for reporting of  
388 Delphi studies. Journal of Clinical Epidemiology, 67, 401–409. doi: 10.1016/j.jclinepi.2013.12.002

389 Heppenheimer, E., Brzeski, K.E., Wooten, R., Waddell, W., Rutledge, L.Y., Chamberlain, M.J., Stahler,  
390 D.R., Hinton, J.W. and VonHoldt, B.M. (2018). Rediscovery of red wolf ghost alleles in a canid  
391 population along the American Gulf Coast. *Genes*, 9(12), p.618.

392 Hoffmann, M., Belant, J.L., Chanson, J.S., Cox, N.A., Lamoreux, J., Rodrigues, A.S., ... Stuart, S.N.  
393 (2011). The changing fates of the world's mammals. *Philosophical Transactions of the Royal Society*  
394 *B: Biological Sciences*, 366(1578), 2598-2610. doi: 10.1098/rstb.2011.0116

395 IUCN SSC Antelope Specialist Group (2017). *Oryx leucoryx*. The IUCN Red List of Threatened Species  
396 2017: e.T15569A50191626. <https://dx.doi.org/10.2305/IUCN.UK.2017-2.RLTS.T15569A50191626.en>.  
397 Downloaded on 10 February 2020

398 Knol, A.B., Slottje, P., van der Sluijs, J.P. and Lebret, E. (2010). The use of expert elicitation in  
399 environmental health impact assessment: a seven step procedure. *Environmental Health*, 9(1), 19.  
400 doi: 10.1186/1476-069X-9-19

401 Murcia-Nova, M.A., Beltrán-Alvarado, D. and Carvajal-Rojas, L. (2009). Un nuevo registro del loro  
402 orejiamarillo (*Ognorhynchus icterotis*: Psittacidae) en la cordillera Oriental colombiana. *Ornitología*  
403 *Colombiana*, 8, 94-99.

404 National Academies of Sciences, Engineering, and Medicine (2019). Evaluating the Taxonomic Status  
405 of the Mexican Gray Wolf and the Red Wolf. Washington, DC: The National Academies Press. doi:  
406 <https://doi.org/10.17226/25351>

407 Renjifo, L. M., Gómez, M. F., Velásquez-Tibatá, J., Amaya-Villarreal, A. M., Kattan, G. H., Amaya-  
408 Espinel, J. D., y Burbano- Girón, J. (2014). Libro rojo de aves de Colombia, Volumen I: bosques  
409 húmedos de los Andes y la costa Pacífica. Editorial Pontificia Universidad Javeriana e Instituto  
410 Alexander von Humboldt. Bogotá D.C., Colombia.

411 Salaman, P., Cortes, A., Waught, D. (2019) Back from the brink of extinction: how the recovery of the  
412 Yellow-Eared Parrot united a nation. *Conservacion colombiana*, 26. Available at  
413 [https://www.proaves.org/wp-content/uploads/2020/01/Conservacion\\_Colombiana\\_26\\_21-35-](https://www.proaves.org/wp-content/uploads/2020/01/Conservacion_Colombiana_26_21-35-Loros-Salaman-et-al.pdf)  
414 [Loros-Salaman-et-al.pdf](https://www.proaves.org/wp-content/uploads/2020/01/Conservacion_Colombiana_26_21-35-Loros-Salaman-et-al.pdf) (last accessed 05/02/2020)

415

## 416 Information circulated to evaluators

### 417 **Project aim**

418 This project aims to quantify the number of mammal and bird extinctions that have been prevented  
419 by conservation action since 1993 (the inception of the Convention on Biological Diversity) and since  
420 2010 (the adoption of Aichi Target 12, which aimed to prevent “the extinction of known threatened  
421 species”). The work is of great interest to the CBD Secretariat and Parties who are meeting in 2020  
422 to launch the Global Biodiversity Outlook 5 (reviewing achievement of the Aichi Targets) and to  
423 adopt a new post-2020 biodiversity framework and targets.

### 424 **What will this exercise entail?**

425 If you agree to participate, you will be asked to review information we have compiled in a standard  
426 format for 23 mammal species that are candidates for having their extinction prevented by  
427 conservation action during one or both time periods. You will be asked to estimate confidentially the  
428 probability that the species would have gone extinct without action for one or both of the time  
429 periods (**Round 1**). We estimate this will take 4 – 6 hours, though it will vary from person to person  
430 and also depend on how much time you spend seeking additional information. You will then be  
431 asked to join a conference call to briefly discuss each species (considering the median and range of  
432 scores across the group) and then revise your scores confidentially (**Round 2**). For the conference  
433 call, you will be asked beforehand to familiarise yourself with the information for a particular small  
434 selection of the species (to be provided beforehand) to contribute especially to the discussion during  
435 the conference call. All scores will be anonymous.

436 Except for the conference call, all other tasks can be completed in your own time within the  
437 designated timeframes. You will be asked not to discuss the scores or other details with anyone else  
438 who is also involved in this elicitation except during the conference call.

439 An overview of the timeline for this exercise can be found in Table 1.

440 *Table 1. Key dates for expert elicitation exercise and time requirement.*

| <b>Dates</b>                           | <b>Task</b>                                                                                                                                              | <b>Time required</b>                  |
|----------------------------------------|----------------------------------------------------------------------------------------------------------------------------------------------------------|---------------------------------------|
| Before 20 December                     | <b>Round 1</b> - Score probabilities in spreadsheet that will be provided                                                                                | 4 – 6 hours                           |
| Before date of conference call         | Familiarise yourself with information provided for a few species in order to contribute to discussion for these species in particular on conference call | 1 - 2 hours                           |
| Date of conference call (tbc)          | Conference call to discuss and revise scores                                                                                                             | 4 hours                               |
| Date of conference call (tbc)          | <b>Round 2</b> - Rescoring                                                                                                                               | This can be completed during the call |
| Between conference call and 17 January | Email round 2 scores back to Rike, ideally immediately after the call                                                                                    | 1 minute                              |

### 441 **Data Protection and confidentiality**

442 You will be asked for demographic information, which, along with your probability scores, will be  
443 kept in password-protected spreadsheets on a computer at Newcastle University, UK. Your name  
444 will be disaggregated from your answers.

445 The results of the expert elicitation exercise (median and agreement between scores) will be  
446 published in a peer-reviewed journal, but individual scores will not be identifiable to person.

#### 447 **Authorship**

448 If you agree to participate and complete both the scoring and take part in the conference call, you  
449 will be offered co-authorship of the scientific publication of this work. We intend to submit the  
450 paper to Conservation Letters.

#### 451 **Will participation prejudice me in any way?**

452 Your participation in this study is completely voluntary. Should you wish to withdraw at any stage, or  
453 to withdraw any comments that you have supplied, you are free to do so without prejudice.

#### 454 **Where can I get further information?**

455 This research has been granted approval by the Newcastle University Ethics Committee (Reference  
456 15388/2018). Should you require any further information, or have any concerns, please do not  
457 hesitate to contact Dr Rike Bolam ([friederike.bolam@ncl.ac.uk](mailto:friederike.bolam@ncl.ac.uk)) or Professor Phil McGowan  
458 ([philip.mcgowan@ncl.ac.uk](mailto:philip.mcgowan@ncl.ac.uk)).

459

## 460 **Instructions**

### 461 **Timeline**

462 See Table 1.

### 463 **Rules**

464 Please do not talk to the other evaluators during scoring for Round 1 OR Round 2. You can use any  
465 other means available to answer the questions - e.g. talk to outsiders, consult literature, draw on  
466 past experience, acquire and interpret data. It would also be appropriate for you to draw on your  
467 own knowledge and experiences of regions or species.

### 468 **Information and data entry**

469 We will make information available to you for every candidate species. You will also be able to use  
470 any other information you have access to. The information provided by us will include the following  
471 for all species:

- 472 ● The population estimate and direction of trends for 1993, 2010, and 2019, as far as known
- 473 ● Generation lengths
- 474 ● Past and current threats to the species
- 475 ● Conservation actions that have taken place
- 476 ● A justification for why the conservation actions the species received in one or both periods are  
477 considered plausibly sufficient to have prevented its extinction, given the magnitude of threats  
478 and the species' population and distribution



479 We will send this information on an excel spreadsheet, alongside the questions, so you can answer  
480 the questions directly in the spreadsheet. We have also uploaded the species information online, in  
481 case you prefer reading the species information in a different format. It is available [here](#).

## 482 Questions

483 We will ask you the same questions for all species. These questions are:

- 484 1. Realistically, what do you think is the **lowest plausible probability** that, if action had ceased in  
485 1993, and no subsequent actions were implemented, the species would have gone extinct by  
486 2020? [Answers from 0 – 100, e.g. a score of 70 means that there is a 70% probability that the  
487 species would have gone extinct by 2020 if action had ceased in 1993 and no actions had been  
488 implemented after that year]
- 489 2. Realistically, what do you think is the **highest plausible probability** that, if action had ceased in  
490 1993, and no subsequent actions were implemented, the species would have gone extinct by  
491 2020? [Answers from 0 – 100, e.g. a score of 70 means that there is a 70% probability that the  
492 species would have gone extinct by 2020 if action had ceased in 1993 and no actions had been  
493 implemented after that year]
- 494 3. Realistically, what is your **best estimate for the probability** that, if action had ceased in 1993,  
495 and no subsequent actions were implemented, the species would have gone extinct by 2020?  
496 [Answers from 0 – 100, e.g. a score of 70 means that there is a 70% probability that the species  
497 would have gone extinct by 2020 if action had ceased in 1993 and no actions had been  
498 implemented after that year]
- 499 4. Additionally, if species met the criteria to be included for the time period 2010 – 2020, the  
500 following questions were also asked: Realistically, what do you think is the **lowest plausible**  
501 **probability** that, if action had ceased in 2010, and no subsequent actions were implemented,  
502 the species would have gone extinct by 2020)? [Answers from 0 – 100, e.g. a score of 70 means  
503 that there is a 70% probability that the species would have gone extinct by 2020 if action had  
504 ceased in 2010 and no actions had been implemented after that year]
- 505 5. Realistically, what do you think is the **highest plausible probability** that, if action had ceased in  
506 2010, and no subsequent actions were implemented, the species would have gone extinct by  
507 2020)? [Answers from 0 – 100, e.g. a score of 70 means that there is a 70% probability that the  
508 species would have gone extinct by 2020 if action had ceased in 2010 and no actions had been  
509 implemented after that year]
- 510 6. Realistically, what is your **best estimate for the probability** that, if action had ceased in 2010,  
511 and no subsequent actions were implemented, the species would have gone extinct by 2020?  
512 [Answers from 0 – 100, e.g. a score of 70 means that there is a 70% probability that the species  
513 would have gone extinct by 2020 if action had ceased in 2010 and no actions had been  
514 implemented after that year]

515

516 In other words, if you give a probability score of 0%, then you are saying that the species would have  
517 persisted even without conservation action, for the time period under consideration. On the other  
518 hand, if you give a probability score of 100%, then you are saying that the species would not have  
519 persisted without conservation action, and would have gone extinct for the time period under  
520 consideration.

521



522 [Frequently asked questions](#)

523 **What makes someone an expert?**

524 For this study we believe that you have sufficient knowledge to help make an estimate with regards  
525 to the questions. Good expert performance is about:

- 526 ● Having a holistic understanding of the subject matter
- 527 ● Always seeking the truth
- 528 ● Knowing the limitations of your knowledge
- 529 ● Producing success when practicing your expertise

530 We want you to have a go at every question. Our question format will enable you to communicate  
531 your uncertainty for each question.

532 **The questions are impossible!**

533 We have tried to make the questions as clear as possible by only asking about two data points.  
534 However, there is always variability, particularly in natural systems. This is why we ask you to  
535 communicate your uncertainty to us by communicating a realistic upper and lower bound that  
536 would capture this uncertainty. We then ask you to think about what the most likely outcome will be  
537 and communicate this to us as your best guess.

538 **How did we identify candidate species?**

539 To qualify as candidates, the species:

- 540 ● Must be likely to be extant currently
- 541 ● Must have had a significant threat or suite of threats that might have driven it extinct in the  
542 absence of actions. This included that the species would have had a small population, or  
543 substantial declines, during one or both of the time periods.
- 544 ● Must have received some significant conservation actions during the period. Conservation  
545 actions must have had, or be likely to have had, a positive impact on the species, i.e. either led  
546 to an increase or slowed a decline of the species.

547 ‘Conservation action’ encompasses the full range of interventions, including protected area  
548 establishment and management, legislation (e.g. to prohibit hunting), control or management of  
549 invasive alien species, control of hunting/trapping, habitat restoration, and species recovery  
550 interventions such as captive breeding, translocation, supplementary feeding, nest-site provision  
551 etc.

552 The screening of species was done by two separate groups. Mammals were identified by Louise Mair  
553 as well as Marco Angelico at the Global Mammal Assessment. The results were then compared, and  
554 any species with disagreement were discussed to reach consensus on inclusion of the species.

555 **How do we define extinction?**

556 For the scores, we would like to know whether the species would have gone **extinct in the wild** if not  
557 for conservation action. We also mean that the last individual in the wild would have disappeared by  
558 2020, and so do not mean functionally extinct. In the paper, we will also list those species that are  
559 currently listed as Extinct in the Wild on the IUCN Red List, to ensure they are included.

560 **What do the probability values reflect?**

561 We have identified a range of categories that the probability values correspond to, see Table 2.

562 Table 2. Range of probabilities and their meaning for whether extinction was prevented through conservation action  
 563 (adapted from Keith et al., 2017).

| Range of probabilities | <i>Was extinction prevented through conservation actions?</i>                                                                                                                                                                                                                                                |
|------------------------|--------------------------------------------------------------------------------------------------------------------------------------------------------------------------------------------------------------------------------------------------------------------------------------------------------------|
| 0.99 - 1.00            | The actions are <b>virtually certain</b> to have prevented extinction, i.e. would have prevented extinction in 99 of 100 species similar to the target. There is a less than one in a hundred chance that the taxon would have persisted without conservation action during the period.                      |
| 0.90 - 0.98            | The actions are <b>very likely</b> to have prevented extinction, i.e. would have prevented extinction in 49 of 50 to 19 of 20 similar species. There is a one in fifty to one in twenty chance that the taxon would have persisted without conservation action during the period.                            |
| 0.75 - 0.90            | The actions are <b>quite likely</b> to have prevented extinction, i.e. would have prevented extinction in 19 of 20 to three in four similar species. There is a one in twenty to one in four chance that the taxon would have persisted without conservation action during the period.                       |
| 0.50 - 0.74            | The actions are <b>more likely than not</b> to have prevented extinction, i.e. would have prevented extinction of three-quarters of similar species. There is a one in four to 50:50 chance that the taxon would have persisted without conservation action during the period.                               |
| 0.25 - 0.49            | The actions are <b>quite possible but unlikely</b> to have prevented extinction, i.e. would have prevented extinction in one quarter to one half of similar species. There is more than a 50:50 and up to a 3 in 4 chance that the taxon would have persisted without conservation action during the period. |
| 0.10 - 0.24            | The actions are <b>quite unlikely</b> to have prevented extinction, i.e. would have prevented extinction of one tenth to one quarter of similar species. There is a 3 in 4 to 9 in 10 chance that the taxon would have persisted without conservation action during the period.                              |
| 0 - 0.09               | The actions are <b>very unlikely</b> to have prevented extinction, i.e. would have prevented extinction of up to one tenth of similar species. There is more than a 9 in 10 chance that the taxon would have persisted without conservation action during the period.                                        |

564

565 **How do we define when an extinction has been prevented?**

566 We will measure agreement amongst the evaluators for all questions, but the best estimate will be  
 567 used as an indication of extinctions prevented. We will summarise the overall results in terms of the  
 568 number of species whose extinction has been prevented as X-Y, with X representing species with a  
 569 median best estimate >50% (i.e. more likely than not to have had their extinction prevented) and Y  
 570 representing species with a median best estimate >90% (i.e. very likely) to have had their extinction  
 571 prevented), following an analogous approach for defining Possibly Extinct and Extinct species  
 572 (Butchart et al., 2018).

573 We have also visualised the probabilities and when extinction was prevented, to help you with your  
 574 assessment (Fig. 1).

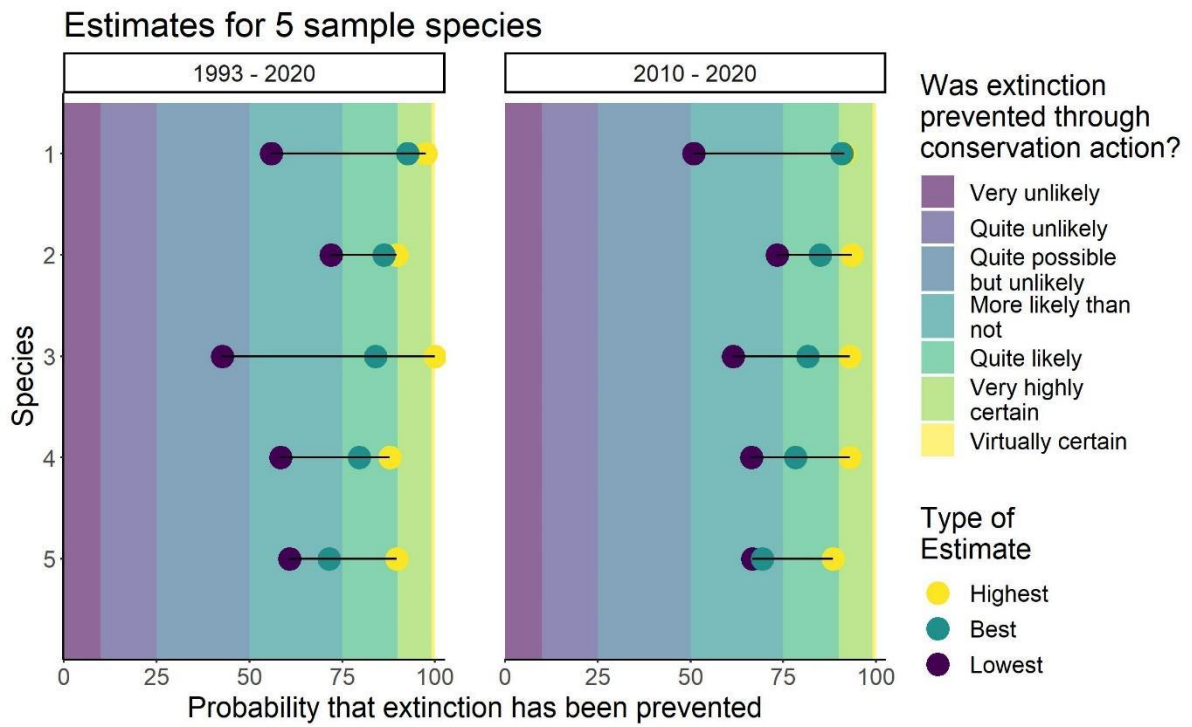

575

576 *Figure 1. Example of highest, best and lowest estimate for probabilities for five species.*

577
